# Supplementary material for: Seven New Alkaloids Isolated from Marine Flavobacterium Tenacibaculum discolor sv11
Source: MDPI journal article supplement (doi:10.3390/md20100620), 2022-09-30
Supplement: s1 [file s1]

## Supplementary Information

# Seven New Alkaloids Isolated from Marine *Flavobacterium Tenacibaculum discolor* sv11

Lei Wang <sup>1,2</sup>, Michael Marner <sup>2</sup>, Ute Mettal <sup>1,2</sup>, Yang Liu <sup>1,2,\*</sup> and Till F. Schäberle <sup>1,2,3,\*</sup>

<sup>1</sup> Institute for Insect Biotechnology, Justus-Liebig-University Giessen, 35392 Giessen, Germany

<sup>2</sup> Fraunhofer Institute for Molecular Biology and Applied Ecology (IME), Branch for Bioresources, 35392 Giessen, Germany

<sup>3</sup> German Center for Infection Research (DZIF), Partner Site Giessen-Marburg-Langen, 35392 Giessen, Germany

\* Correspondence: Till.F.Schaeberle@agrar.uni-giessen.de; Tel.: +49-(0)641-97219-140 (T.F.S.);  
Liu.Yang@agrar.uni-giessen.de (Y.L.)

## Contents

|                                                                                                                                                   |    |
|---------------------------------------------------------------------------------------------------------------------------------------------------|----|
| Figure S1. The HR-ESI-MS and HR-ESI-MS/MS of compound 1.....                                                                                      | 1  |
| Figure S2. The $^1\text{H}$ -NMR (700 MHz, $\text{DMSO-}d_6$ ) spectrum of compound 1.....                                                        | 2  |
| Figure S3. The $^{13}\text{C}$ -NMR (175 MHz, $\text{DMSO-}d_6$ ) spectrum of compound 1.....                                                     | 2  |
| Figure S4. The HSQC (700 MHz, $\text{DMSO-}d_6$ ) spectrum of compound 1.....                                                                     | 3  |
| Figure S5. The $^1\text{H}$ - $^1\text{H}$ COSY (700 MHz, $\text{DMSO-}d_6$ ) spectrum of compound 1. ....                                        | 3  |
| Figure S6. The $^1\text{H}$ - $^{13}\text{C}$ HMBC (700 MHz, $\text{DMSO-}d_6$ ) spectrum of compound 1. ....                                     | 4  |
| Figure S7. The $^1\text{H}$ - $^{15}\text{N}$ HMBC (700 MHz, $\text{DMSO-}d_6$ ) spectrum of compound 1.....                                      | 4  |
| Figure S8. The $^1\text{H}$ - $^{15}\text{N}$ HMBC (700 MHz, $\text{DMSO-}d_6$ ) spectrum of compound 1 (measured with non-uniform sampling)..... | 5  |
| Figure S9. The $^1\text{H}$ -NMR (700 MHz, $\text{DMSO-}d_6$ ) spectrum of compound 1 with TFA added. ....                                        | 5  |
| Figure S10. The HSQC (700 MHz, $\text{DMSO-}d_6$ ) spectrum of compound 1 with TFA added. ....                                                    | 6  |
| Figure S11. The $^1\text{H}$ - $^1\text{H}$ COSY (700 MHz, $\text{DMSO-}d_6$ ) spectrum of compound 1 with TFA added. ....                        | 6  |
| Figure S12. The $^1\text{H}$ - $^{13}\text{C}$ HMBC (700 MHz, $\text{DMSO-}d_6$ ) spectrum of compound 1 with TFA added. ....                     | 7  |
| Figure S13. The $^1\text{H}$ - $^{15}\text{N}$ HMBC (700 MHz, $\text{DMSO-}d_6$ ) spectrum of compound 1 with TFA added. ....                     | 7  |
| Figure S14. The HR-ESI-MS and HR-ESI-MS/MS of compound 2.....                                                                                     | 8  |
| Figure S15. The $^1\text{H}$ -NMR (700 MHz, $\text{DMSO-}d_6$ ) spectrum of compound 2.....                                                       | 9  |
| Figure S16. The $^{13}\text{C}$ -NMR (175 MHz, $\text{DMSO-}d_6$ ) spectrum of compound 2.....                                                    | 9  |
| Figure S17. The HSQC (700 MHz, $\text{DMSO-}d_6$ ) spectrum of compound 2.....                                                                    | 10 |
| Figure S18. The $^1\text{H}$ - $^1\text{H}$ COSY (700 MHz, $\text{DMSO-}d_6$ ) spectrum of compound 2. ....                                       | 10 |
| Figure S19. The $^1\text{H}$ - $^{13}\text{C}$ HMBC (700 MHz, $\text{DMSO-}d_6$ ) spectrum of compound 2. ....                                    | 11 |
| Figure S20. The HR-ESI-MS and HR-ESI-MS/MS of compound 3.....                                                                                     | 12 |
| Figure S21. The $^1\text{H}$ -NMR (700 MHz, $\text{DMSO-}d_6$ ) spectrum of compound 3.....                                                       | 13 |
| Figure S22. The $^{13}\text{C}$ -NMR (175 MHz, $\text{DMSO-}d_6$ ) spectrum of compound 3.....                                                    | 13 |
| Figure S23. The HSQC (700 MHz, $\text{DMSO-}d_6$ ) spectrum of compound 3.....                                                                    | 14 |
| Figure S24. The $^1\text{H}$ - $^1\text{H}$ COSY (700 MHz, $\text{DMSO-}d_6$ ) spectrum of compound 3. ....                                       | 14 |
| Figure S25. The $^1\text{H}$ - $^{13}\text{C}$ HMBC (700 MHz, $\text{DMSO-}d_6$ ) spectrum of compound 3. ....                                    | 15 |
| Figure S26. The HR-ESI-MS and HR-ESI-MS/MS of compound 4.....                                                                                     | 16 |

|                                                                                                          |    |
|----------------------------------------------------------------------------------------------------------|----|
| Figure S27. The $^1\text{H}$ -NMR (700 MHz, DMSO- $d_6$ ) spectrum of compound 4.....                    | 17 |
| Figure S28. The $^{13}\text{C}$ -NMR (175 MHz, DMSO- $d_6$ ) spectrum of compound 4.....                 | 17 |
| Figure S29. The HSQC (700 MHz, DMSO- $d_6$ ) spectrum of compound 4.....                                 | 18 |
| Figure S30. The $^1\text{H}$ - $^1\text{H}$ COSY (700 MHz, DMSO- $d_6$ ) spectrum of compound 4. ....    | 18 |
| Figure S31. The $^1\text{H}$ - $^{13}\text{C}$ HMBC (700 MHz, DMSO- $d_6$ ) spectrum of compound 4. .... | 19 |
| Figure S32. The HR-ESI-MS and HR-ESI-MS/MS of compound 5.....                                            | 20 |
| Figure S33. The $^1\text{H}$ -NMR (700 MHz, DMSO- $d_6$ ) spectrum of compound 5.....                    | 21 |
| Figure S34. The HSQC (700 MHz, DMSO- $d_6$ ) spectrum of compound 5.....                                 | 21 |
| Figure S35. The $^1\text{H}$ - $^1\text{H}$ COSY (700 MHz, DMSO- $d_6$ ) spectrum of compound 5. ....    | 22 |
| Figure S36. The $^1\text{H}$ - $^{13}\text{C}$ HMBC (700 MHz, DMSO- $d_6$ ) spectrum of compound 5. .... | 22 |
| Figure S37. The HR-ESI-MS and HR-ESI-MS/MS of compound 6.....                                            | 23 |
| Figure S38. The $^1\text{H}$ -NMR (700 MHz, DMSO- $d_6$ ) spectrum of compound 6.....                    | 24 |
| Figure S39. The $^{13}\text{C}$ -NMR (175 MHz, DMSO- $d_6$ ) spectrum of compound 6.....                 | 24 |
| Figure S40. The HSQC (700 MHz, DMSO- $d_6$ ) spectrum of compound 6.....                                 | 25 |
| Figure S41. The $^1\text{H}$ - $^1\text{H}$ COSY (700 MHz, DMSO- $d_6$ ) spectrum of compound 6. ....    | 25 |
| Figure S42. The $^1\text{H}$ - $^{13}\text{C}$ HMBC (700 MHz, DMSO- $d_6$ ) spectrum of compound 6. .... | 26 |
| Figure S43. The HR-ESI-MS and HR-ESI-MS/MS of compound 7.....                                            | 27 |
| Figure S44. The $^1\text{H}$ -NMR (700 MHz, DMSO- $d_6$ ) spectrum of compound 7.....                    | 28 |
| Figure S45. The $^{13}\text{C}$ -NMR (175 MHz, DMSO- $d_6$ ) spectrum of compound 7.....                 | 28 |
| Figure S46. The HSQC (700 MHz, DMSO- $d_6$ ) spectrum of compound 7.....                                 | 29 |
| Figure S47. The $^1\text{H}$ - $^1\text{H}$ COSY (700 MHz, DMSO- $d_6$ ) spectrum of compound 7. ....    | 29 |
| Figure S48. The $^1\text{H}$ - $^{13}\text{C}$ HMBC (700 MHz, DMSO- $d_6$ ) spectrum of compound 7. .... | 30 |
| Figure S49. SDS-PAGE gel showing the purification of His-tagged DisA. ....                               | 30 |

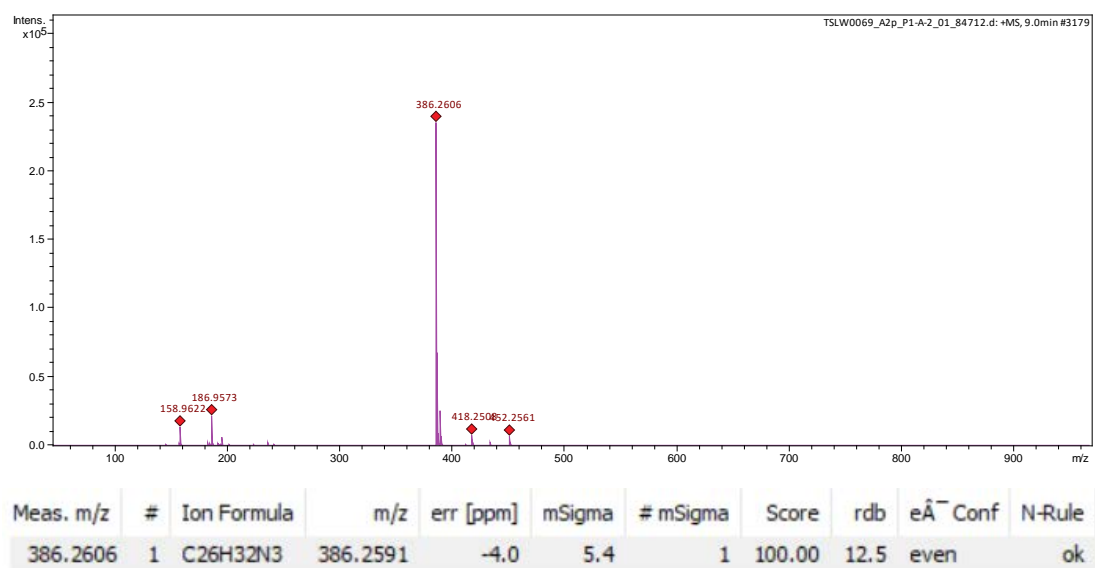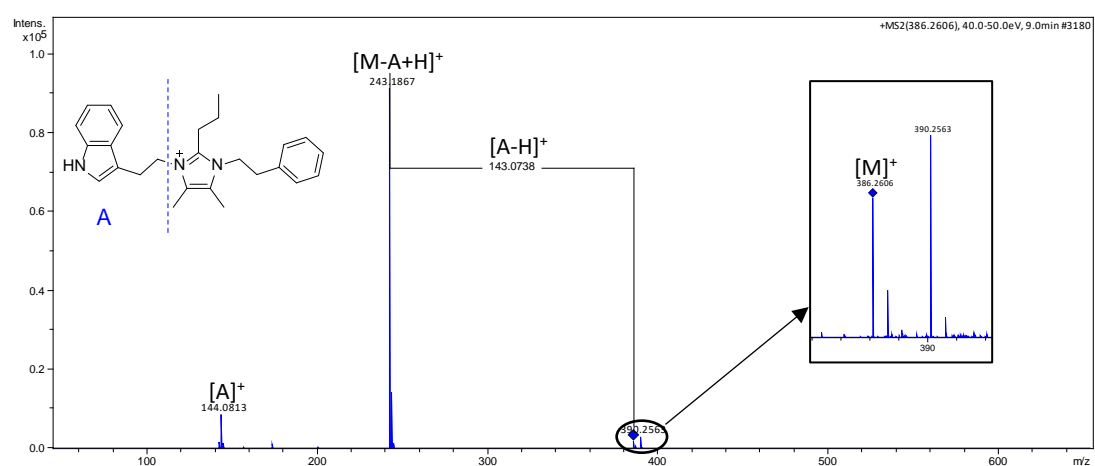

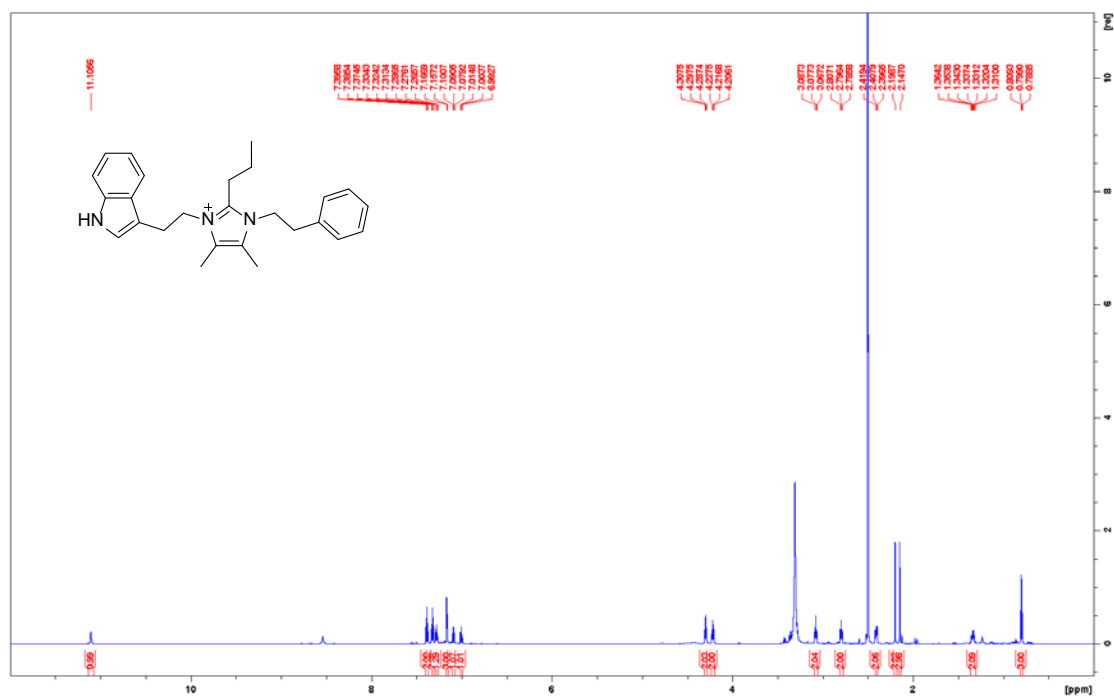

Figure S2. The <sup>1</sup>H-NMR (700 MHz, DMSO-*d*<sub>6</sub>) spectrum of compound 1.

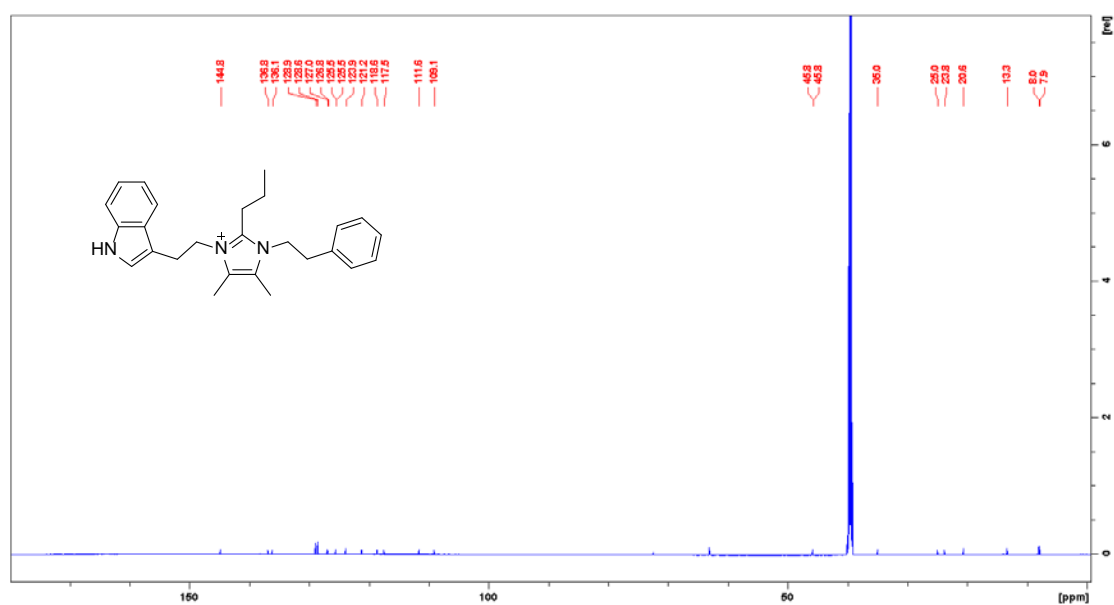

Figure S3. The <sup>13</sup>C-NMR (175 MHz, DMSO-*d*<sub>6</sub>) spectrum of compound 1.

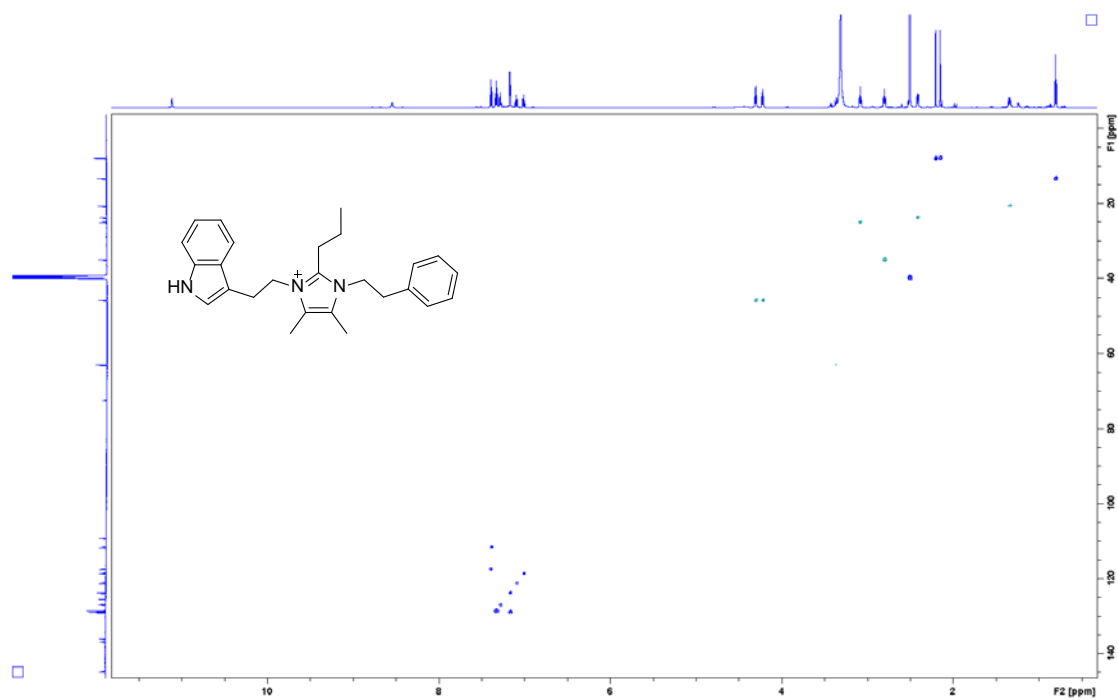

**Figure S4.** The HSQC (700 MHz,  $\text{DMSO-}d_6$ ) spectrum of compound 1.

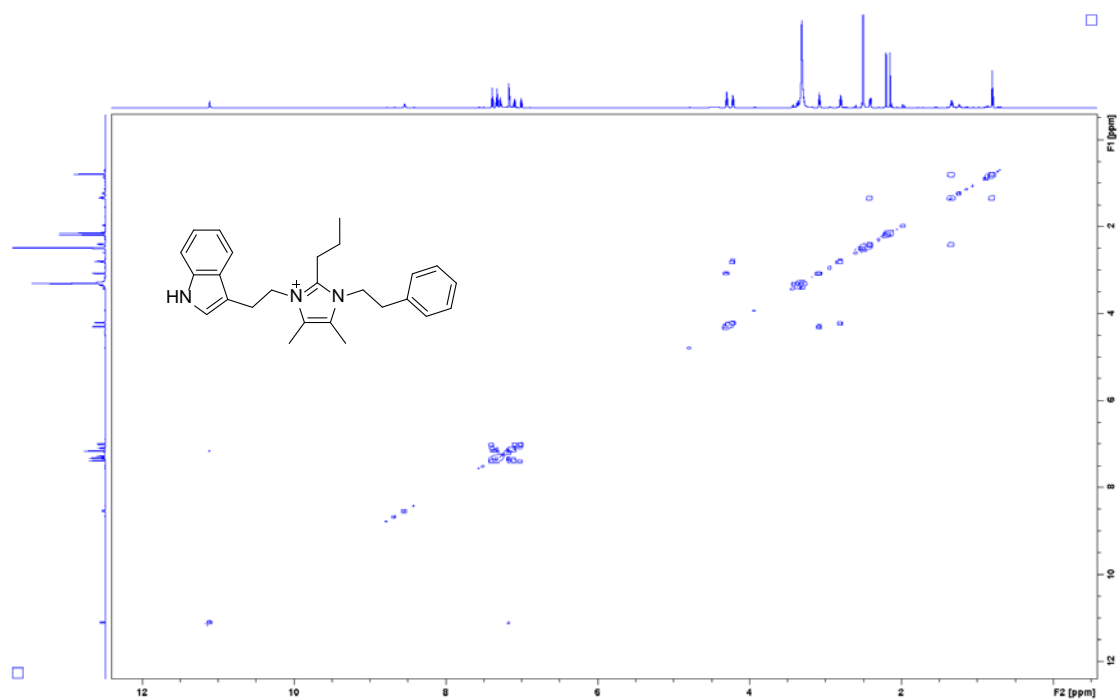

**Figure S5.** The  $^1\text{H}$ - $^1\text{H}$  COSY (700 MHz,  $\text{DMSO-}d_6$ ) spectrum of compound 1.

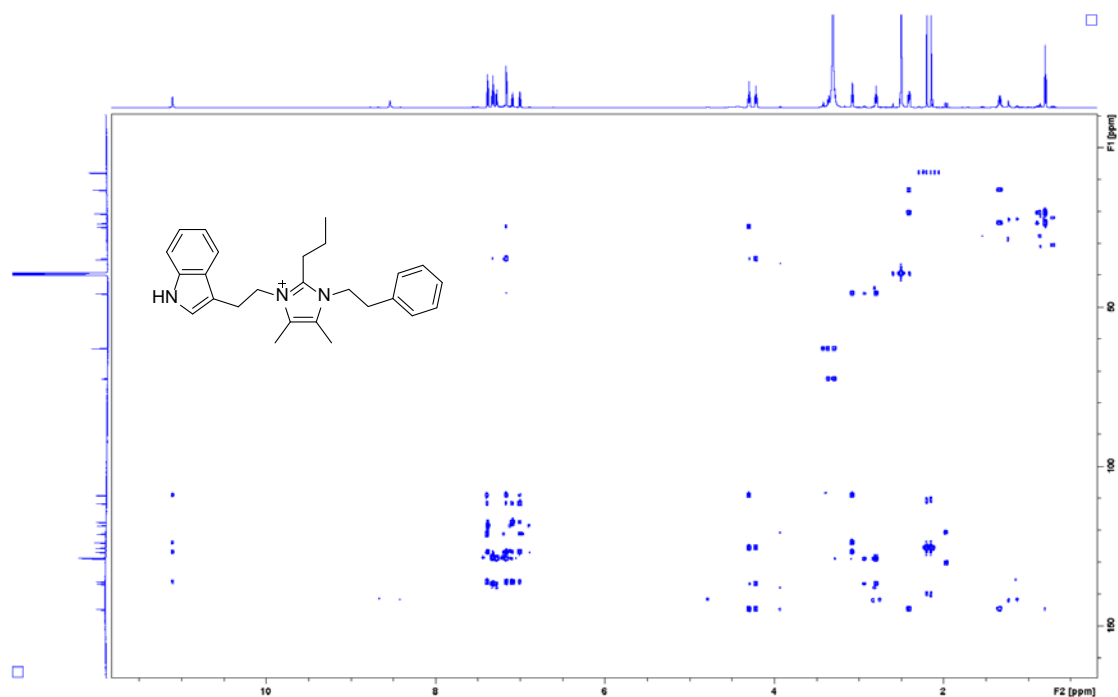

Figure S6. The  $^1\text{H}$ - $^{13}\text{C}$  HMBC (700 MHz,  $\text{DMSO}-d_6$ ) spectrum of compound 1.

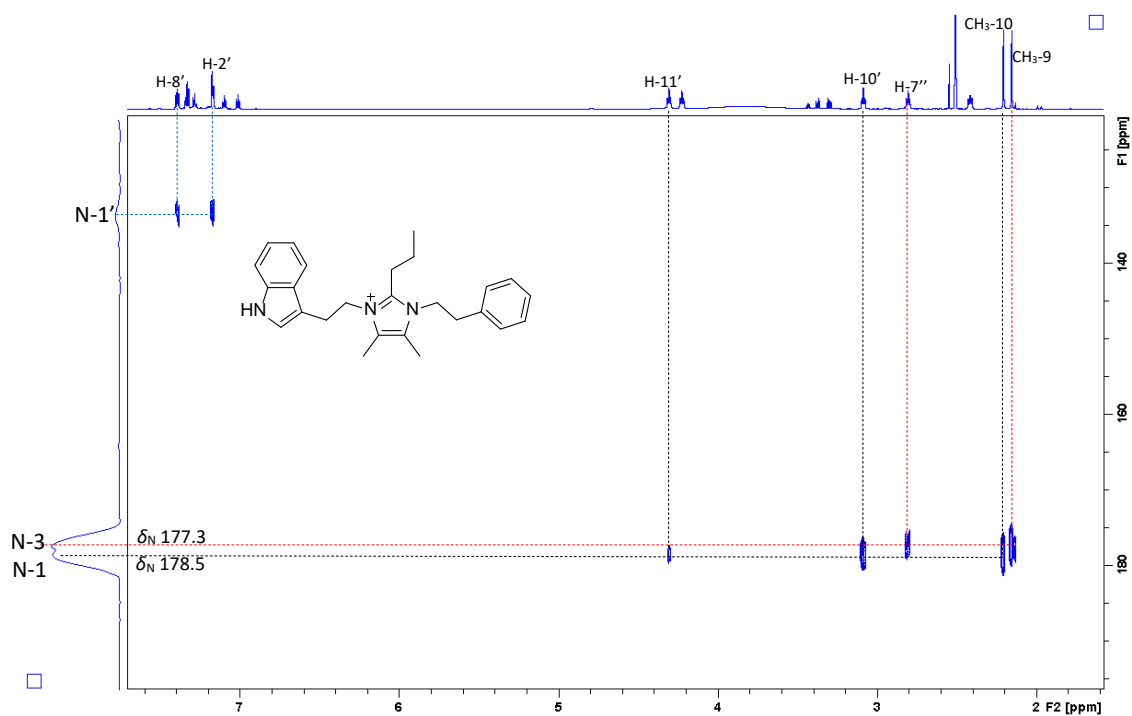

Figure S7. The  $^1\text{H}$ - $^{15}\text{N}$  HMBC (700 MHz,  $\text{DMSO}-d_6$ ) spectrum of compound 1.

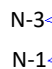

**Figure S8. The  $^1\text{H}$ - $^{15}\text{N}$  HMBC (700 MHz,  $\text{DMSO-}d_6$ ) spectrum of compound **1** (measured with non-uniform sampling).**

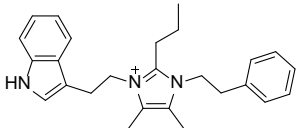

**Figure S9. The  $^1\text{H}$ -NMR (700 MHz,  $\text{DMSO-}d_6$ ) spectrum of compound 1 with TFA added.**



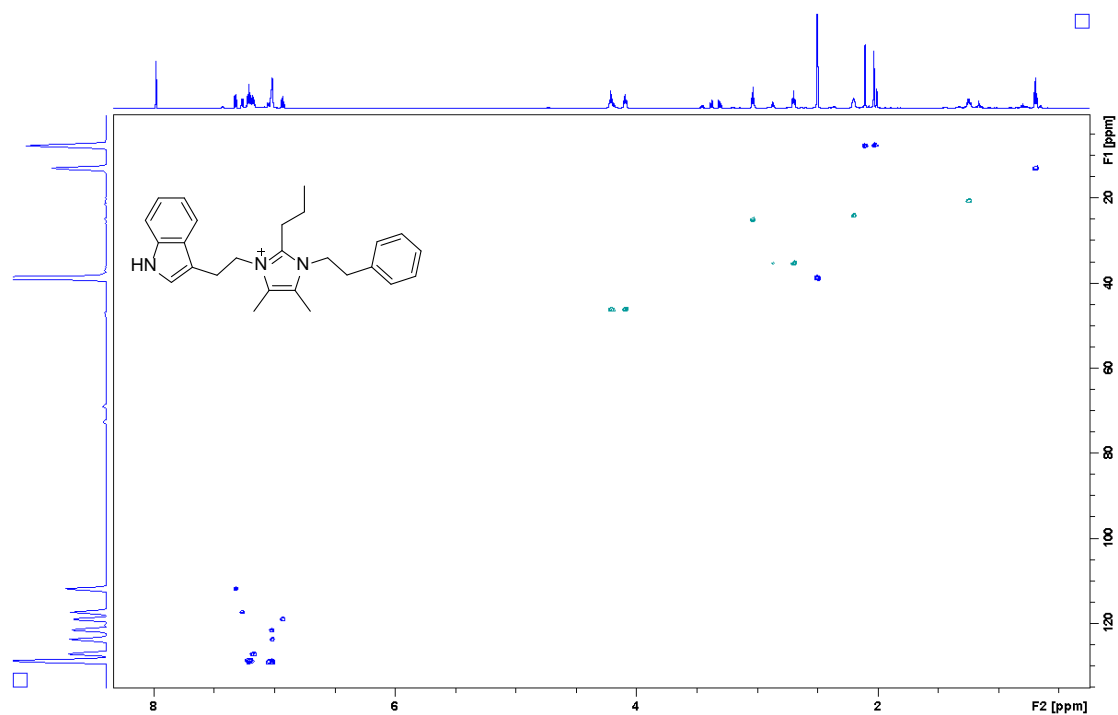

**Figure S10.** The HSQC (700 MHz,  $\text{DMSO-}d_6$ ) spectrum of compound 1 with TFA added.

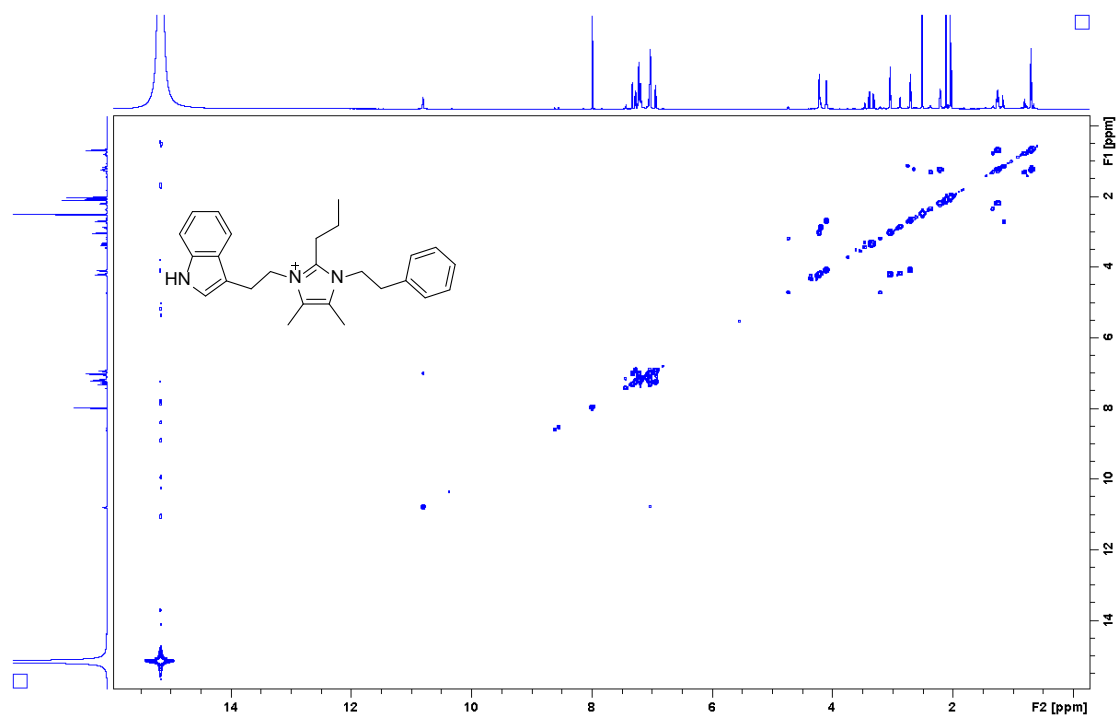

**Figure S11.** The  $^1\text{H}$ - $^1\text{H}$  COSY (700 MHz,  $\text{DMSO-}d_6$ ) spectrum of compound 1 with TFA added.

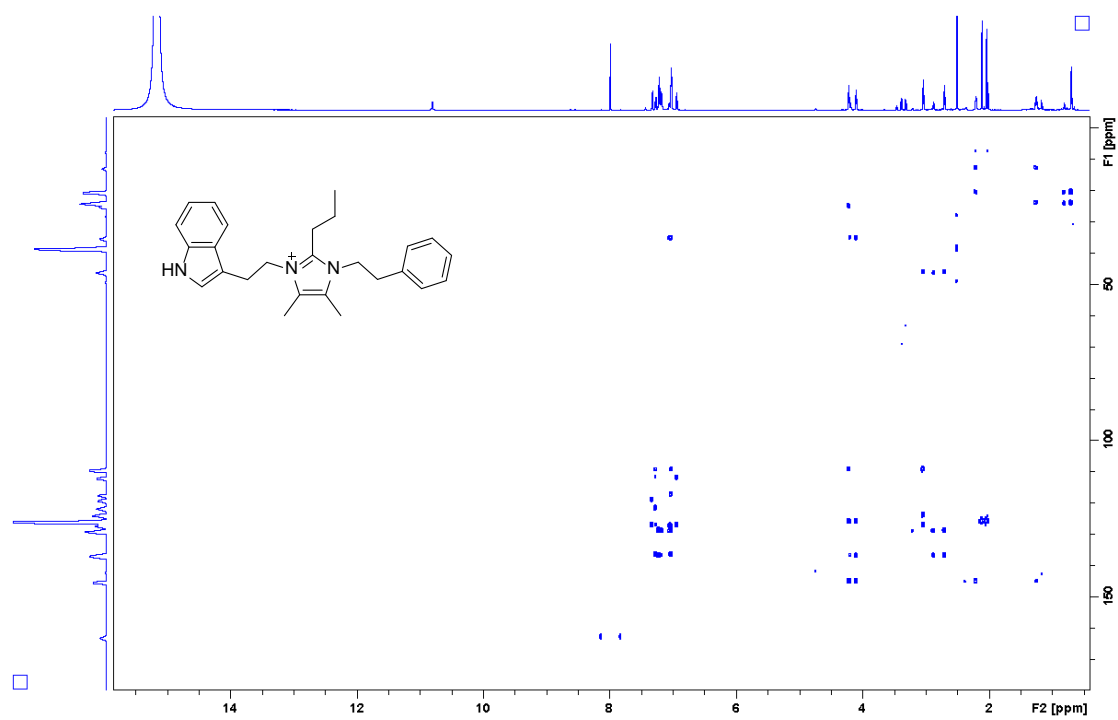

**Figure S12.** The  $^1\text{H}$ - $^{13}\text{C}$  HMBC (700 MHz,  $\text{DMSO}-d_6$ ) spectrum of compound 1 with TFA added.

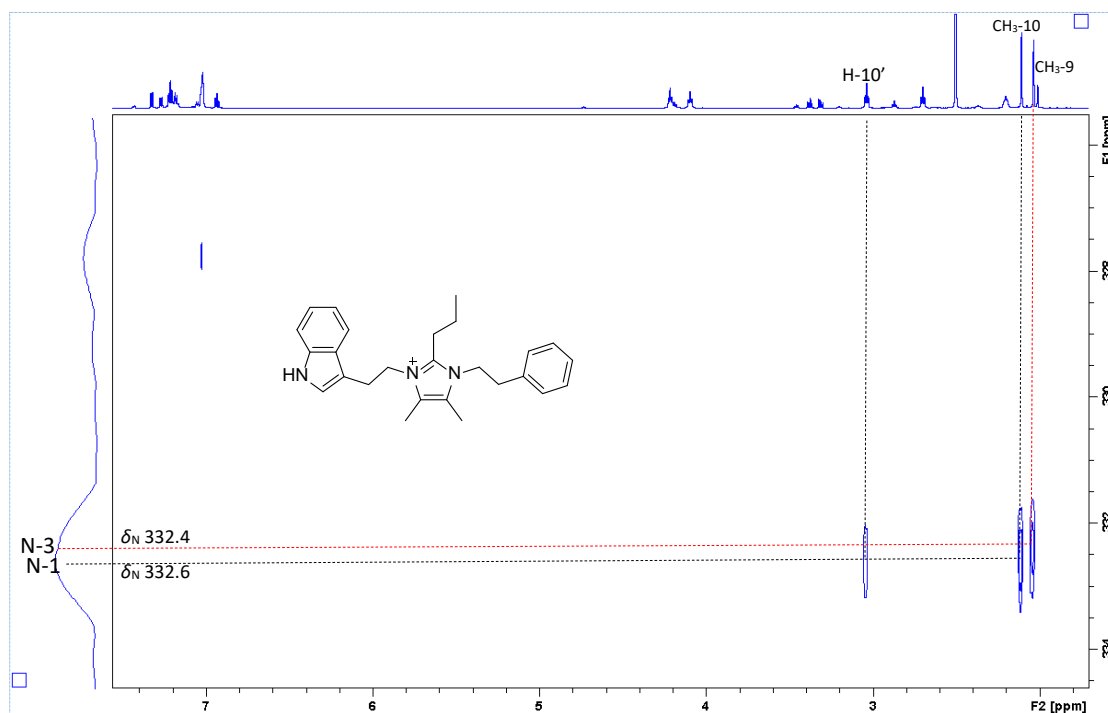

**Figure S13.** The  $^1\text{H}$ - $^{15}\text{N}$  HMBC (700 MHz,  $\text{DMSO}-d_6$ ) spectrum of compound 1 with TFA added.

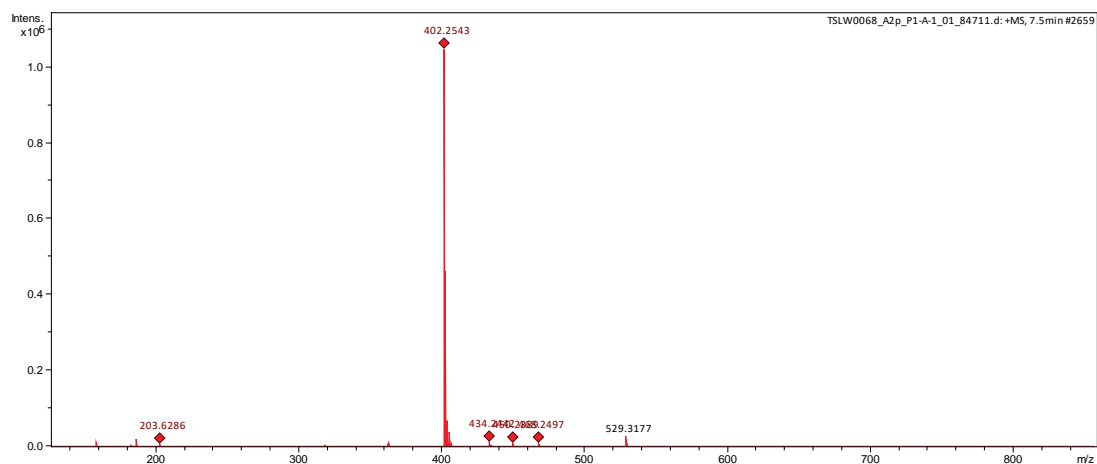

| Meas. $m/z$ | # | Ion Formula                                                    | $m/z$    | err [ppm] | mSigma | # mSigma | Score  | rdB  | e <sup>-</sup> Conf | N-Rule |
|-------------|---|----------------------------------------------------------------|----------|-----------|--------|----------|--------|------|---------------------|--------|
| 402.2543    | 1 | C <sub>26</sub> H <sub>32</sub> N <sub>3</sub> O               | 402.2540 | -0.9      | 85.1   | 1        | 100.00 | 12.5 | even                | ok     |
| 402.2543    | 2 | C <sub>14</sub> H <sub>36</sub> N <sub>5</sub> O <sub>8</sub>  | 402.2558 | 3.7       | 154.4  | 2        | 1.20   | -0.5 | even                | ok     |
| 402.2543    | 3 | C <sub>11</sub> H <sub>28</sub> N <sub>15</sub> O <sub>2</sub> | 402.2545 | 0.4       | 154.9  | 3        | 2.40   | 5.5  | even                | ok     |

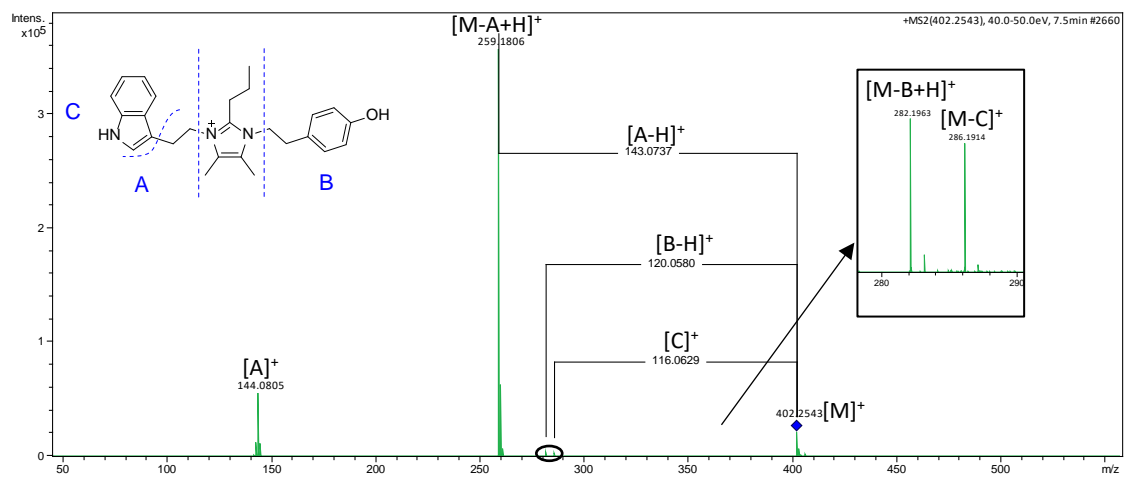

**Figure S14. The HR-ESI-MS and HR-ESI-MS/MS of compound 2.**

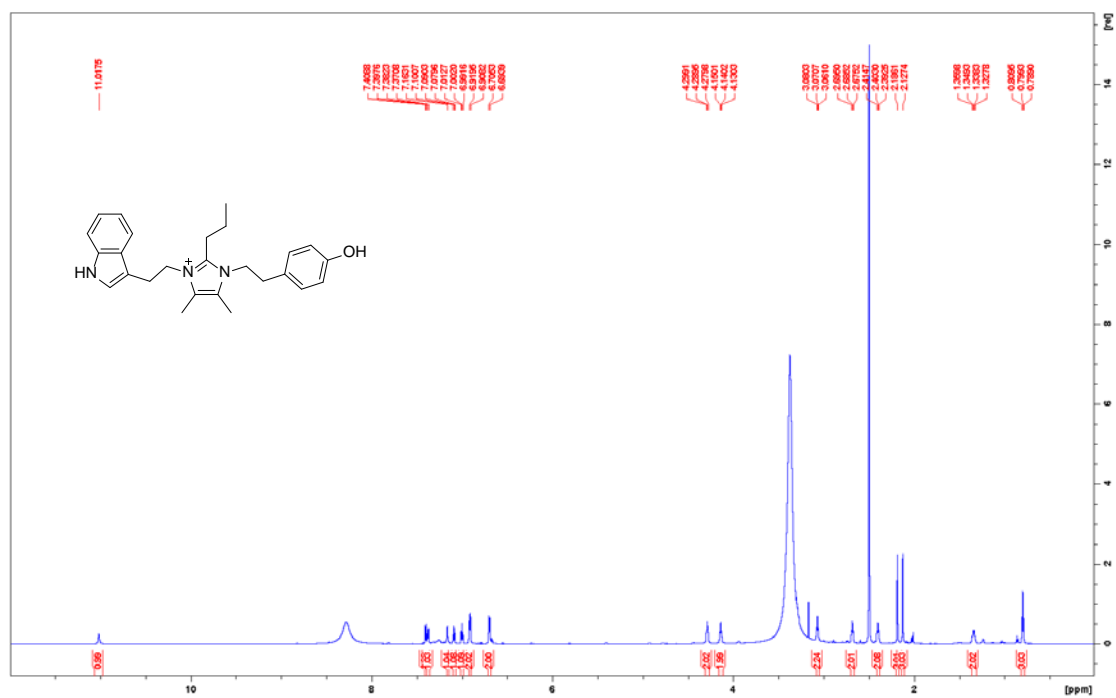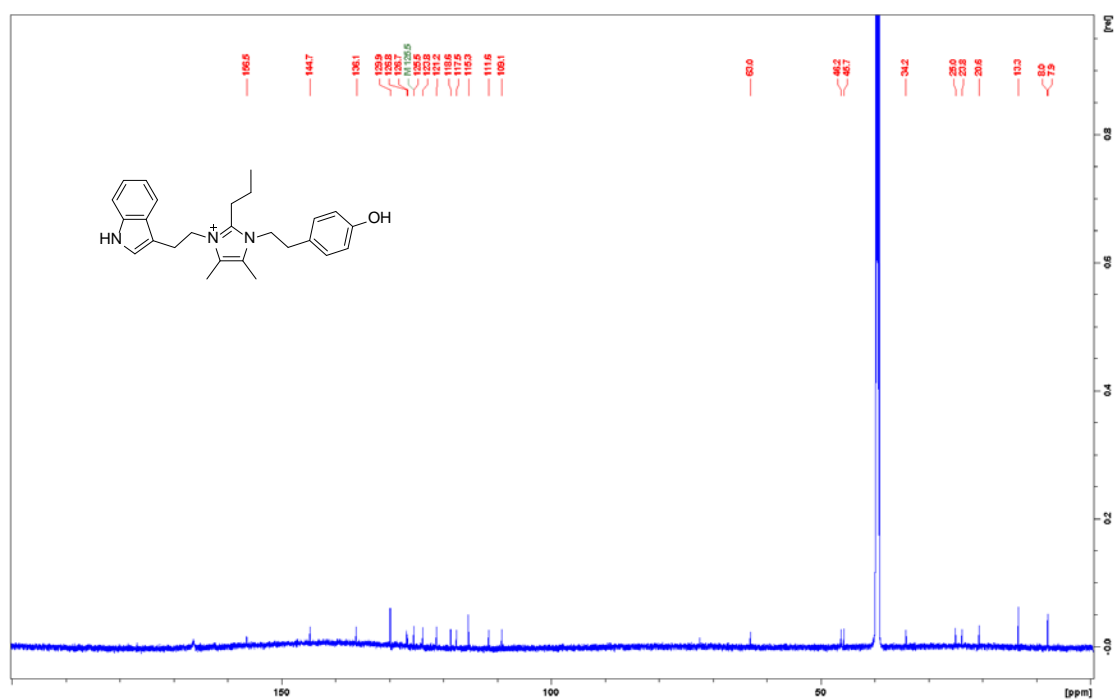

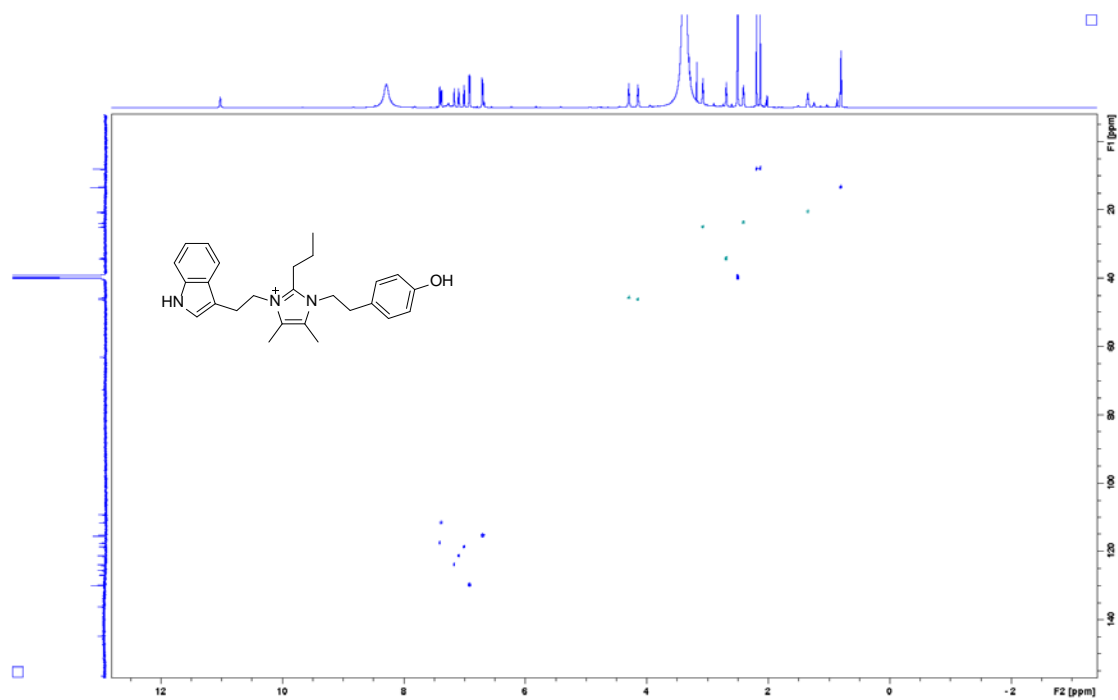

**Figure S17.** The HSQC (700 MHz, DMSO- $d_6$ ) spectrum of compound 2.

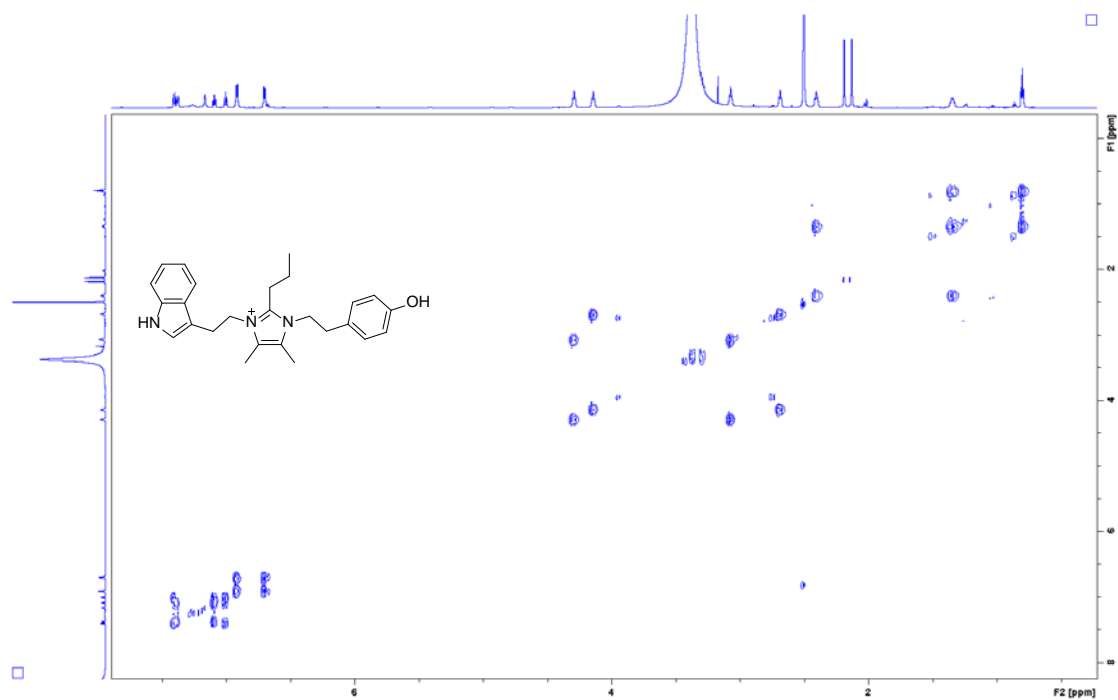

**Figure S18.** The  $^1\text{H}$ - $^1\text{H}$  COSY (700 MHz, DMSO- $d_6$ ) spectrum of compound 2.

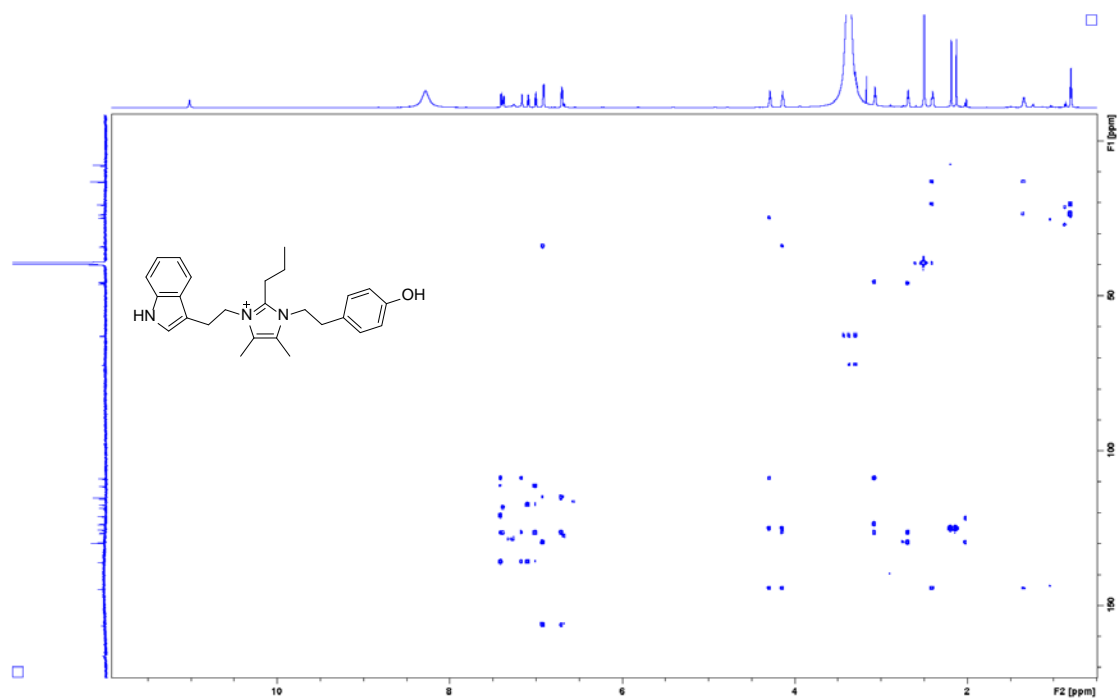

**Figure S19.** The  $^1\text{H}$ - $^{13}\text{C}$  HMBC (700 MHz,  $\text{DMSO}-d_6$ ) spectrum of compound 2.

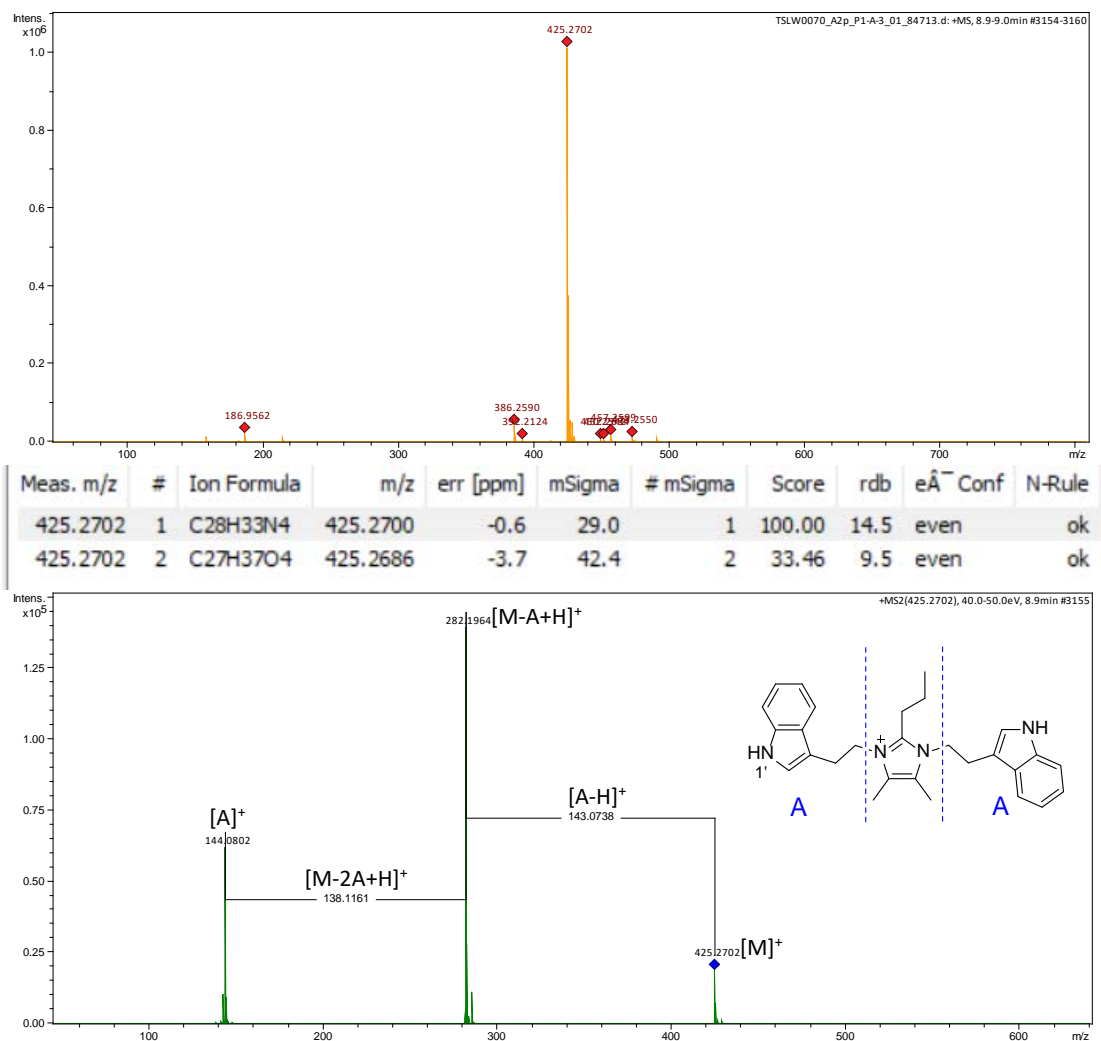

**Figure S20. The HR-ESI-MS and HR-ESI-MS/MS of compound 3.**

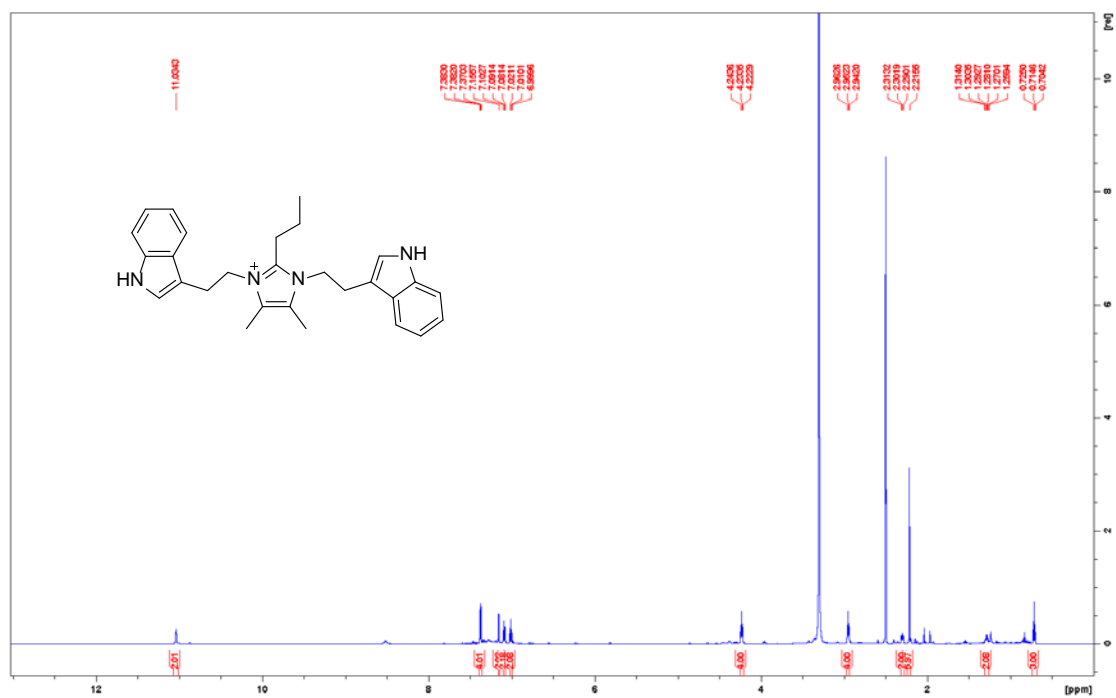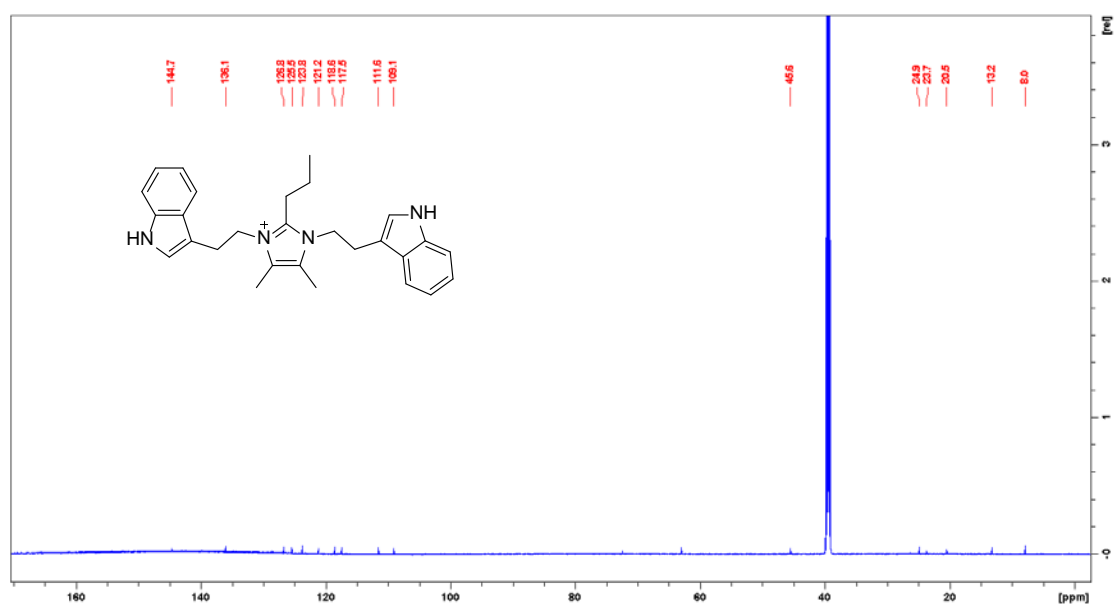



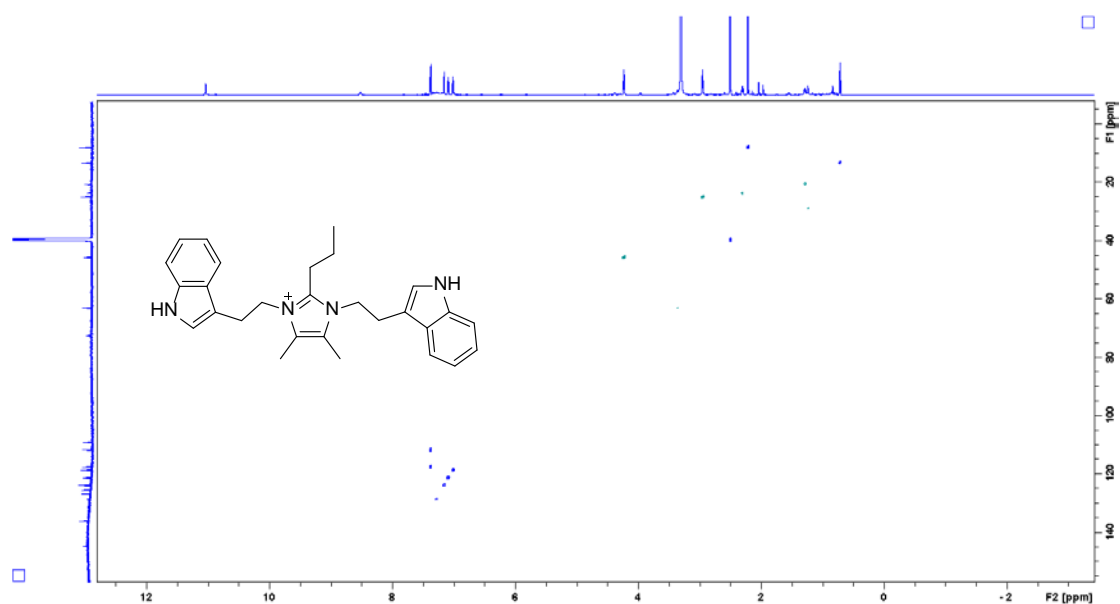

**Figure S23.** The HSQC (700 MHz,  $\text{DMSO-}d_6$ ) spectrum of compound 3.

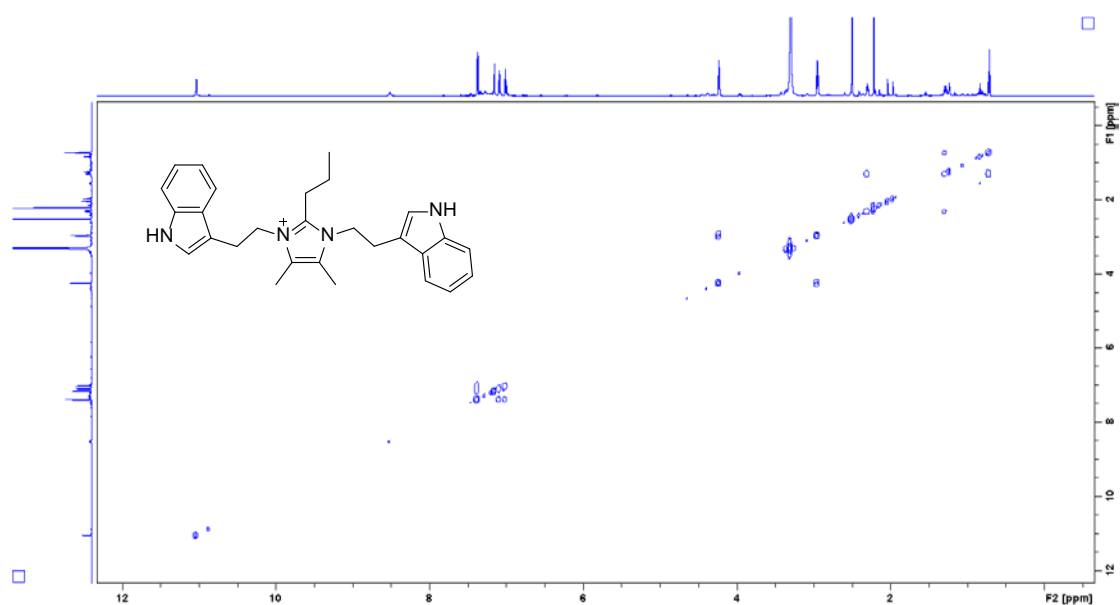

**Figure S24.** The  $^1\text{H}$ - $^1\text{H}$  COSY (700 MHz,  $\text{DMSO-}d_6$ ) spectrum of compound 3.

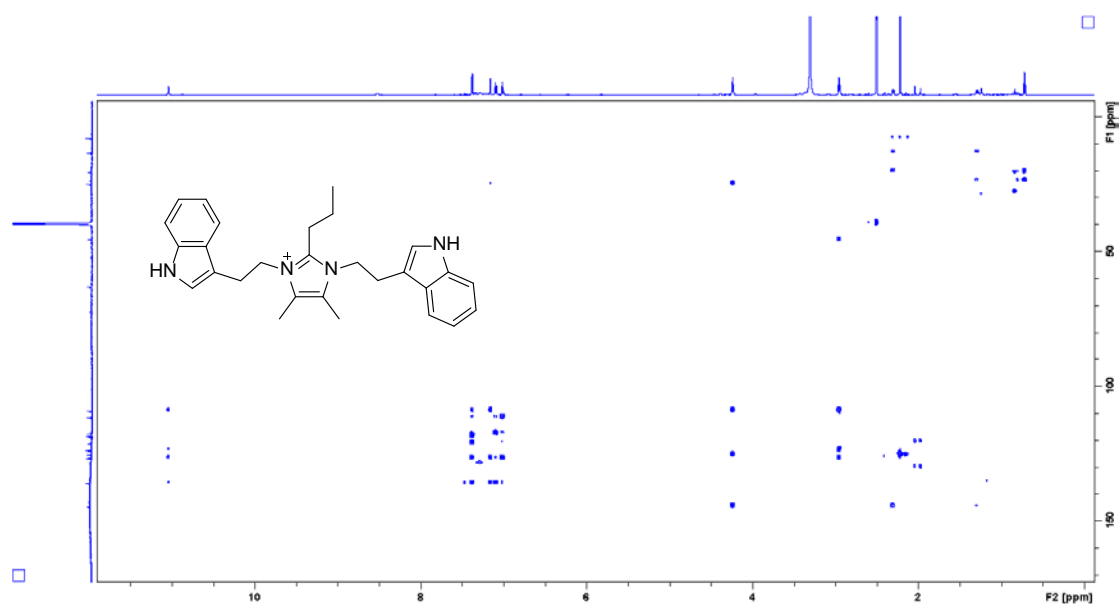

**Figure S25.** The  $^1\text{H}$ - $^{13}\text{C}$  HMBC (700 MHz,  $\text{DMSO}-d_6$ ) spectrum of compound 3.

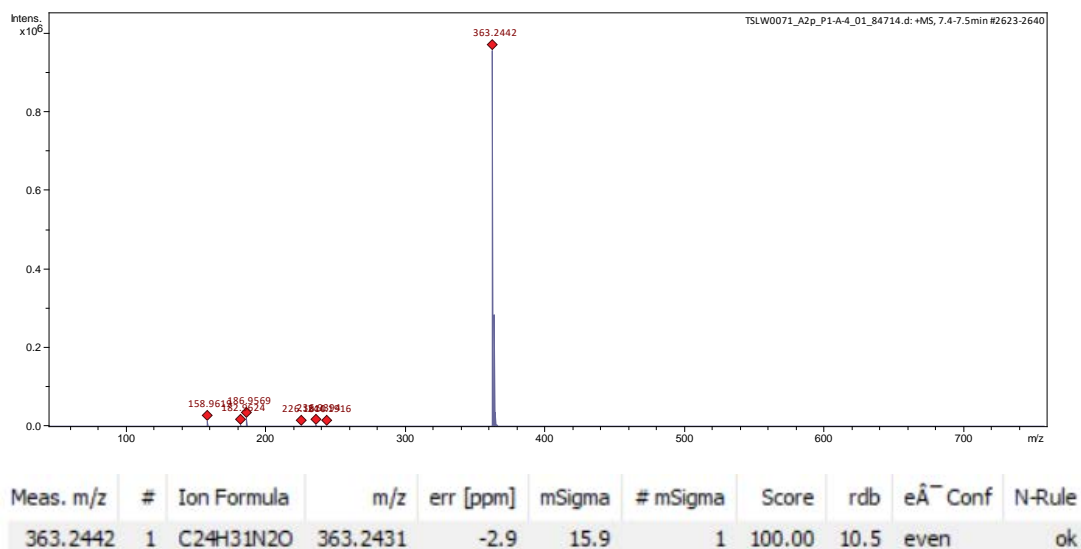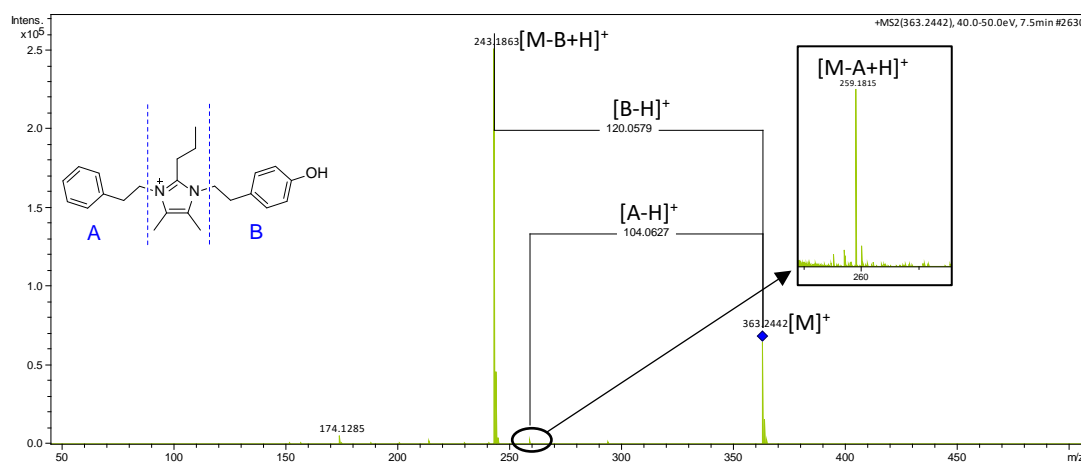

**Figure S26. The HR-ESI-MS and HR-ESI-MS/MS of compound 4.**

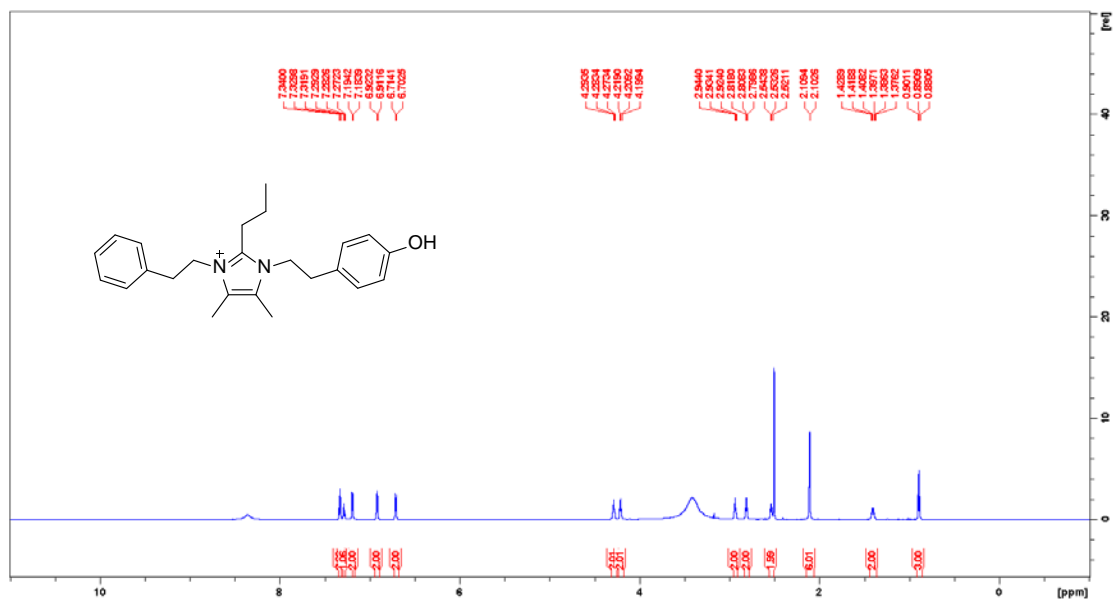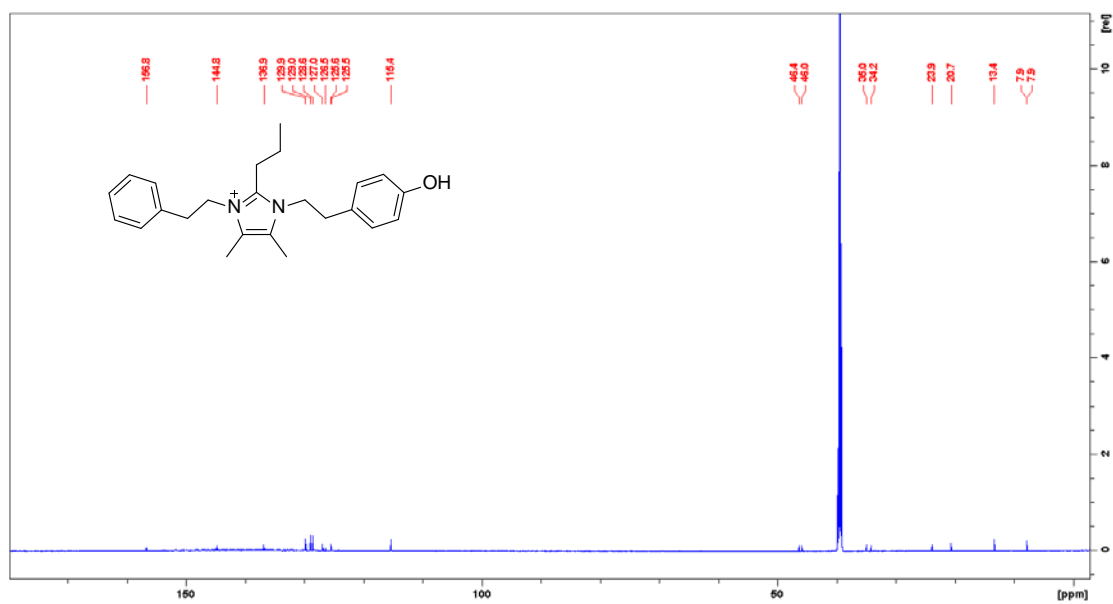

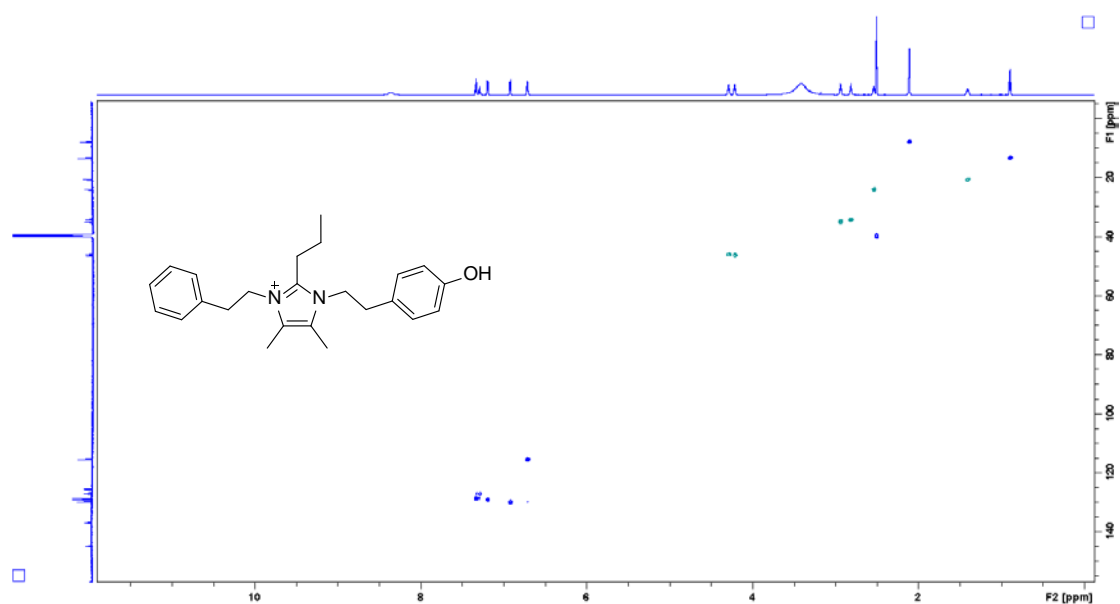

**Figure S29.** The HSQC (700 MHz, DMSO-*d*<sub>6</sub>) spectrum of compound 4.

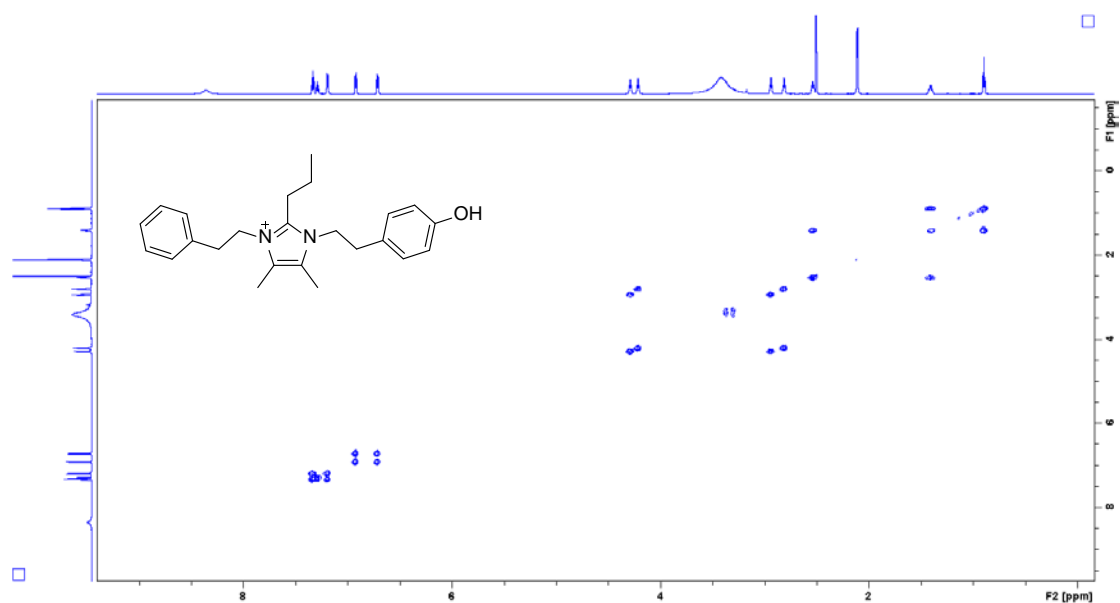

**Figure S30.** The <sup>1</sup>H-<sup>1</sup>H COSY (700 MHz, DMSO-*d*<sub>6</sub>) spectrum of compound 4.

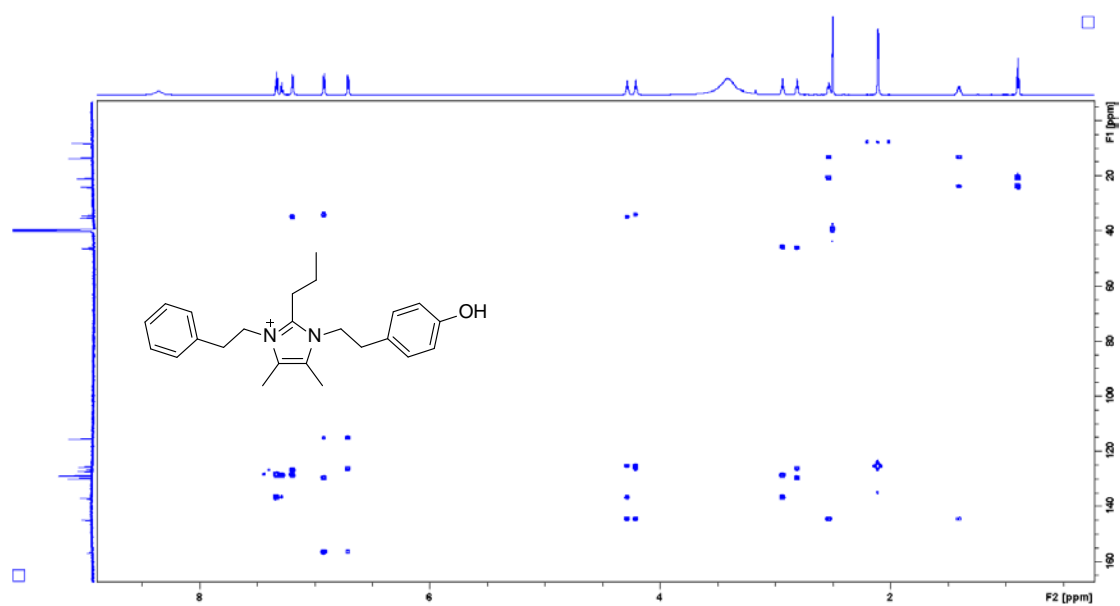

**Figure S31.** The  $^1\text{H}$ - $^{13}\text{C}$  HMBC (700 MHz,  $\text{DMSO-}d_6$ ) spectrum of compound 4.

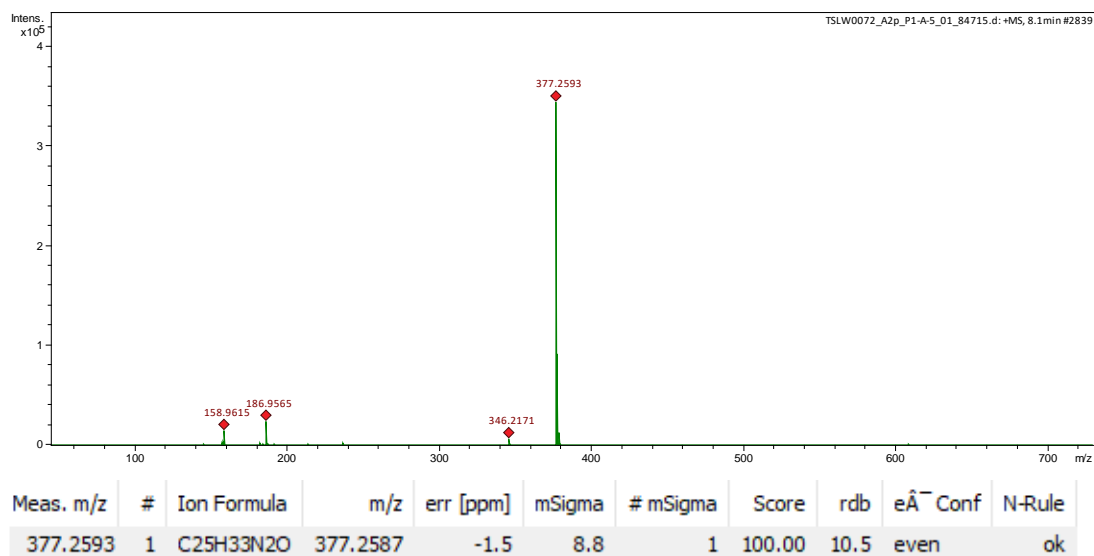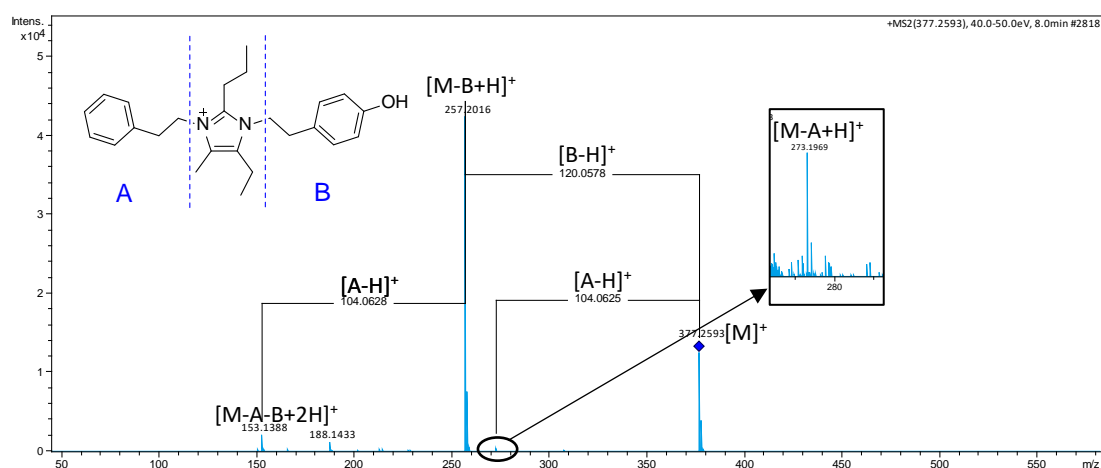

**Figure S32. The HR-ESI-MS and HR-ESI-MS/MS of compound 5.**

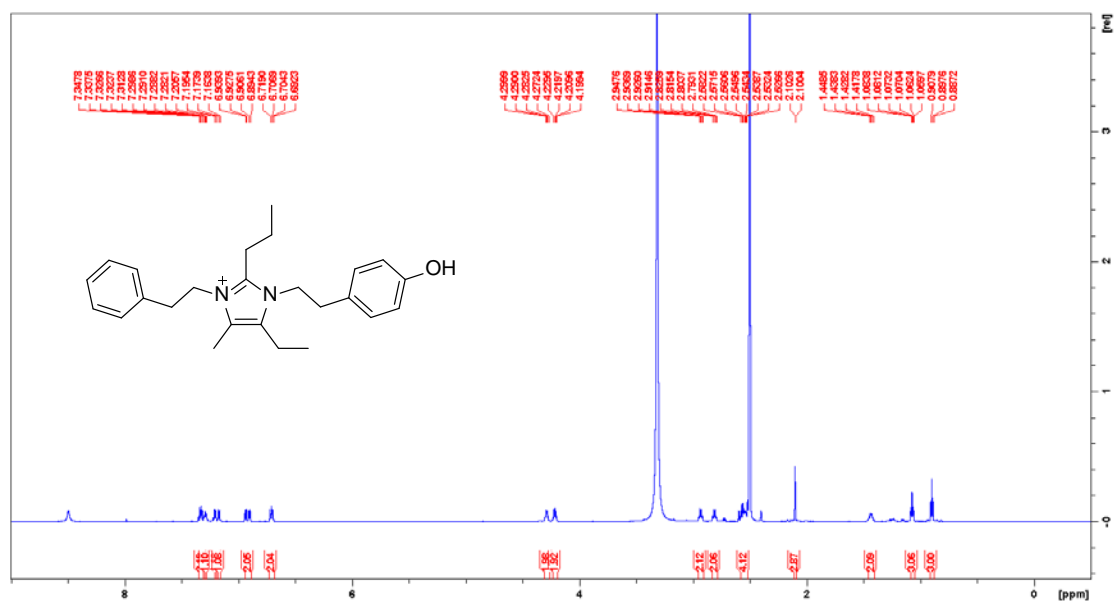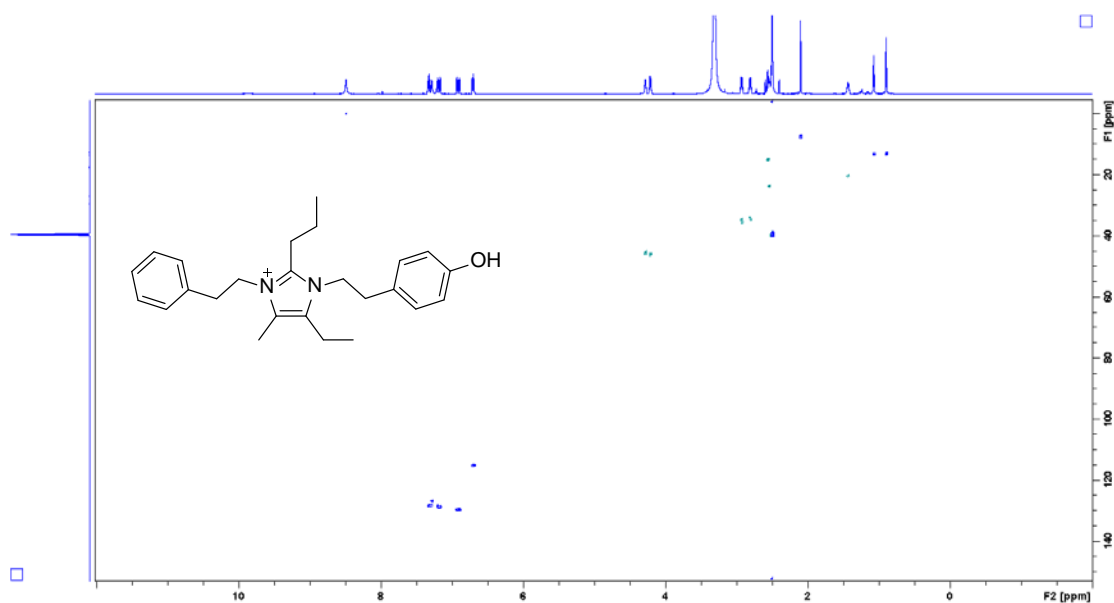



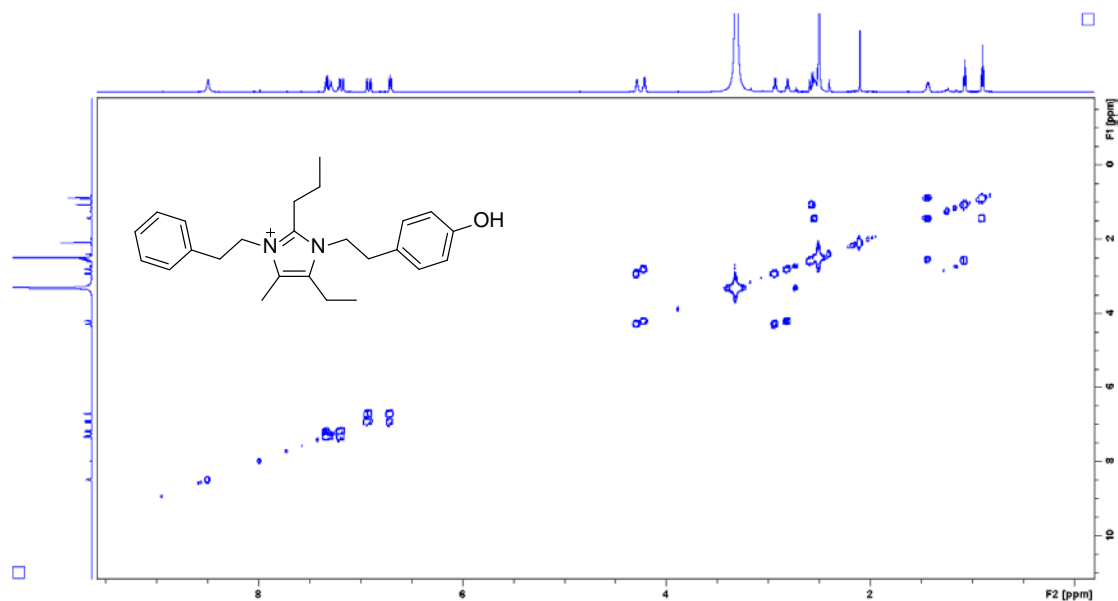

Figure S35. The  $^1\text{H}$ - $^1\text{H}$  COSY (700 MHz,  $\text{DMSO}-d_6$ ) spectrum of compound 5.

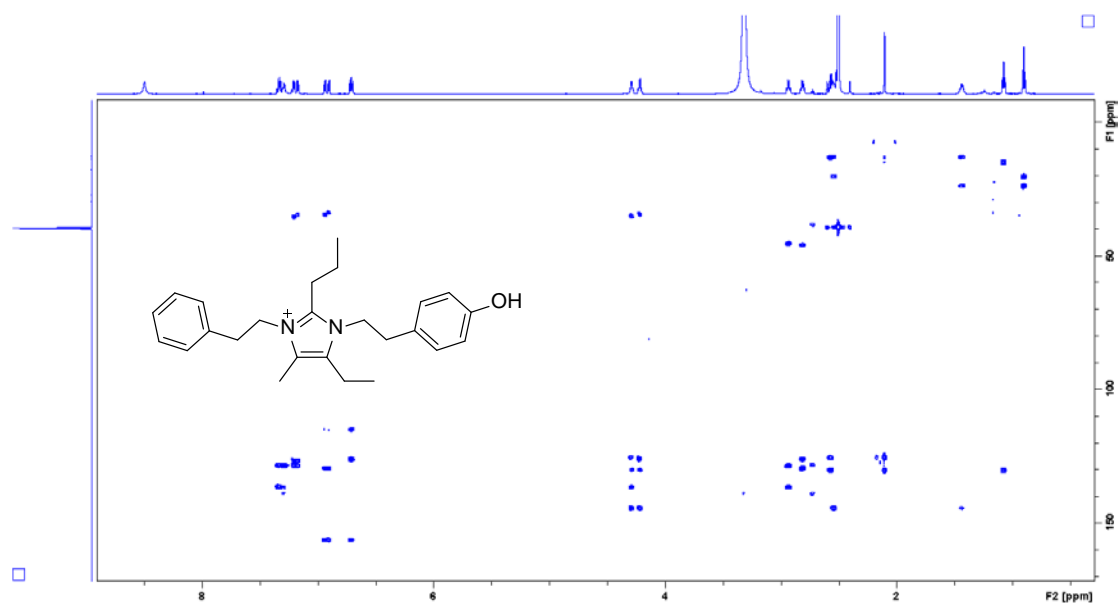

Figure S36. The  $^1\text{H}$ - $^{13}\text{C}$  HMBC (700 MHz,  $\text{DMSO}-d_6$ ) spectrum of compound 5.

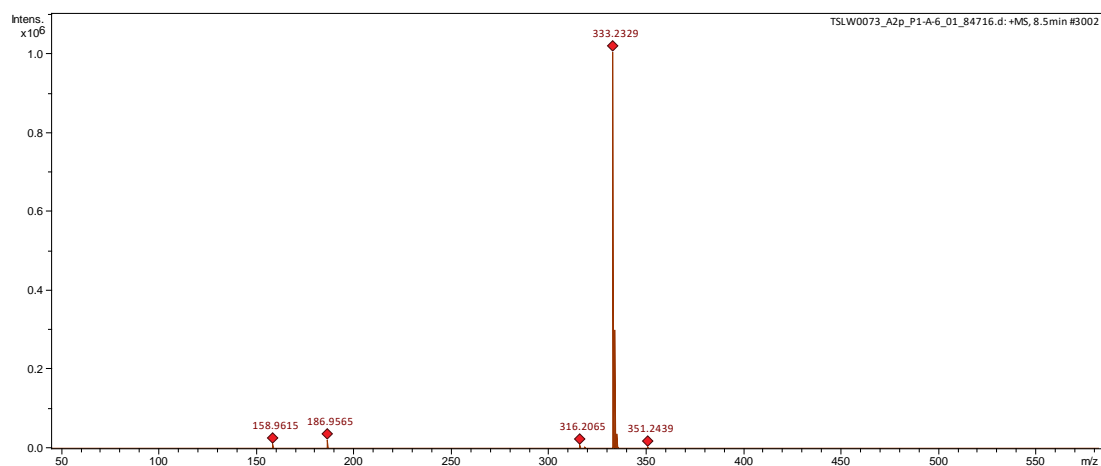

| Meas. m/z | # | Ion Formula                                    | m/z      | err [ppm] | mSigma | # mSigma | Score  | rdb  | eÅ <sup>-</sup> Conf | N-Rule |
|-----------|---|------------------------------------------------|----------|-----------|--------|----------|--------|------|----------------------|--------|
| 333.2329  | 1 | C <sub>23</sub> H <sub>29</sub> N <sub>2</sub> | 333.2325 | -1.2      | 23.6   | 1        | 100.00 | 10.5 | even                 | ok     |

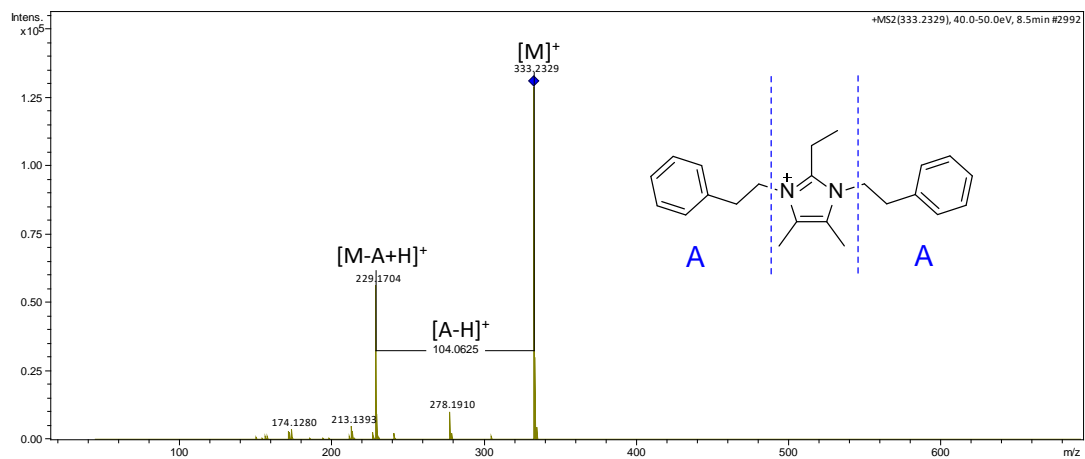

**Figure S37. The HR-ESI-MS and HR-ESI-MS/MS of compound 6.**

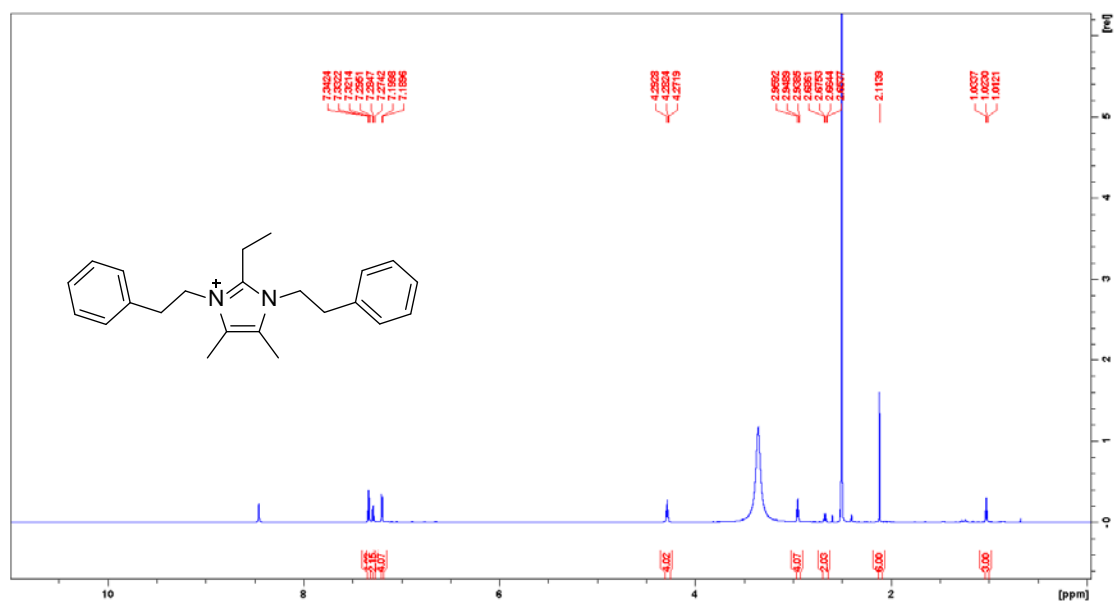

Figure S38. The  $^1\text{H}$ -NMR (700 MHz,  $\text{DMSO}-d_6$ ) spectrum of compound 6

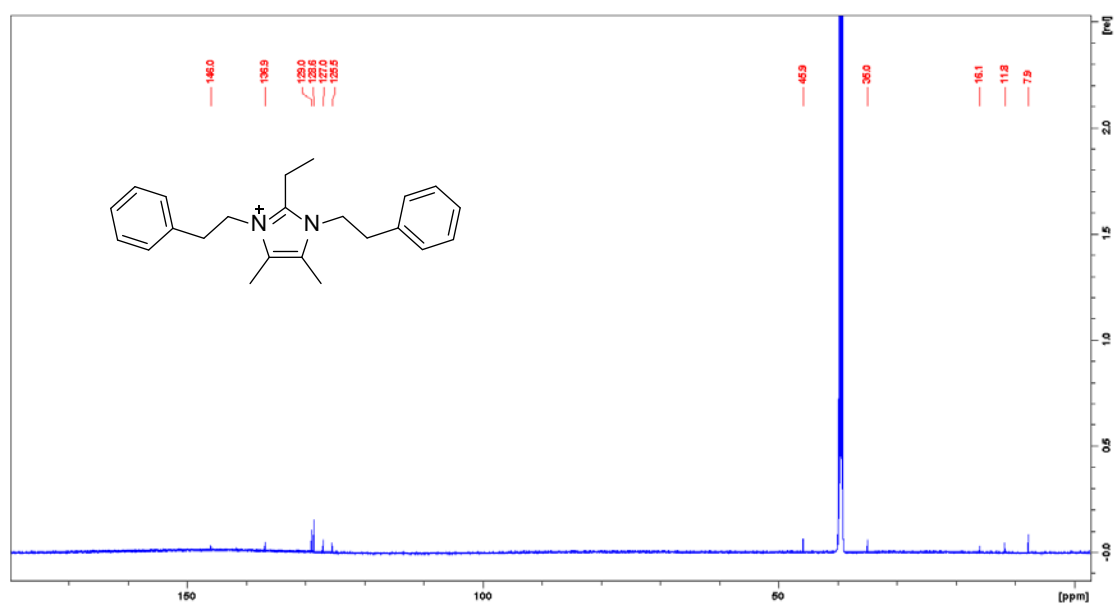

Figure S39. The  $^{13}\text{C}$ -NMR (175 MHz,  $\text{DMSO}-d_6$ ) spectrum of compound 6

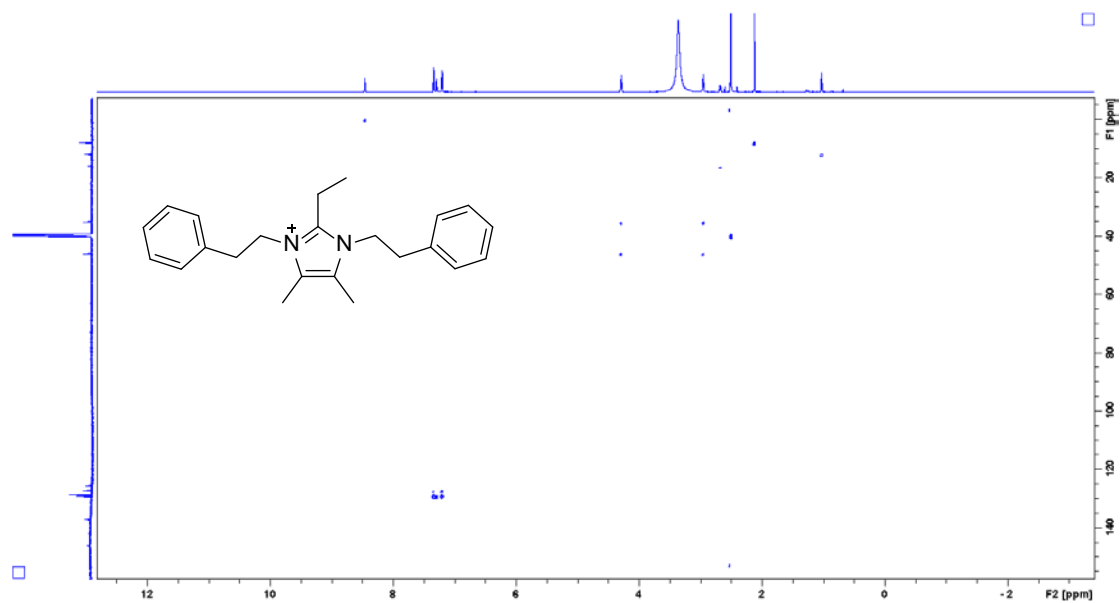

Figure S40. The HSQC (700 MHz,  $\text{DMSO-}d_6$ ) spectrum of compound 6.

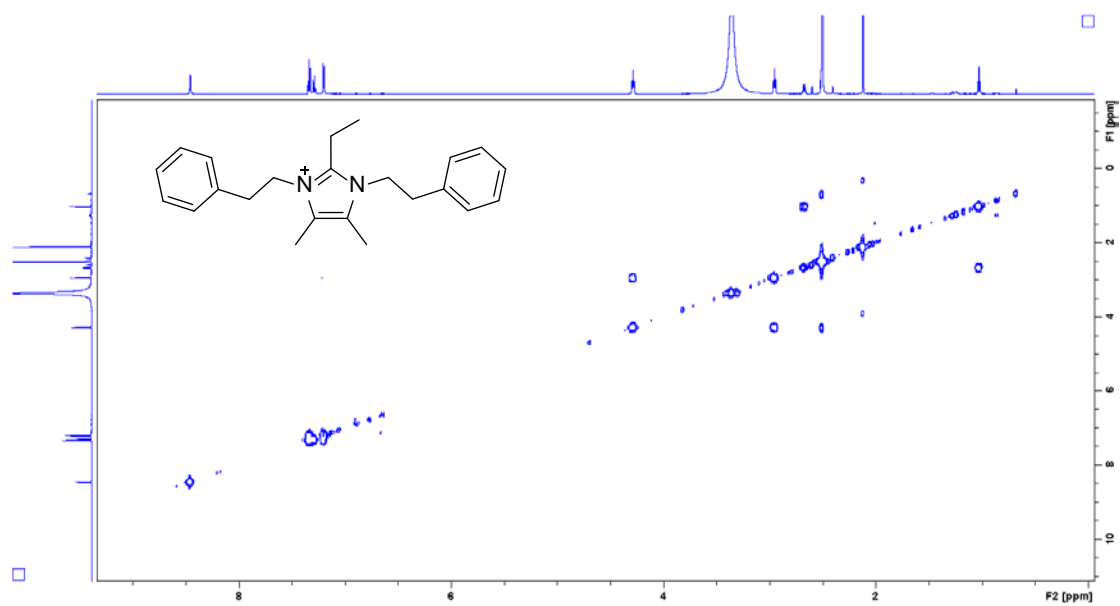

Figure S41. The  $^1\text{H}$ - $^1\text{H}$  COSY (700 MHz,  $\text{DMSO-}d_6$ ) spectrum of compound 6.

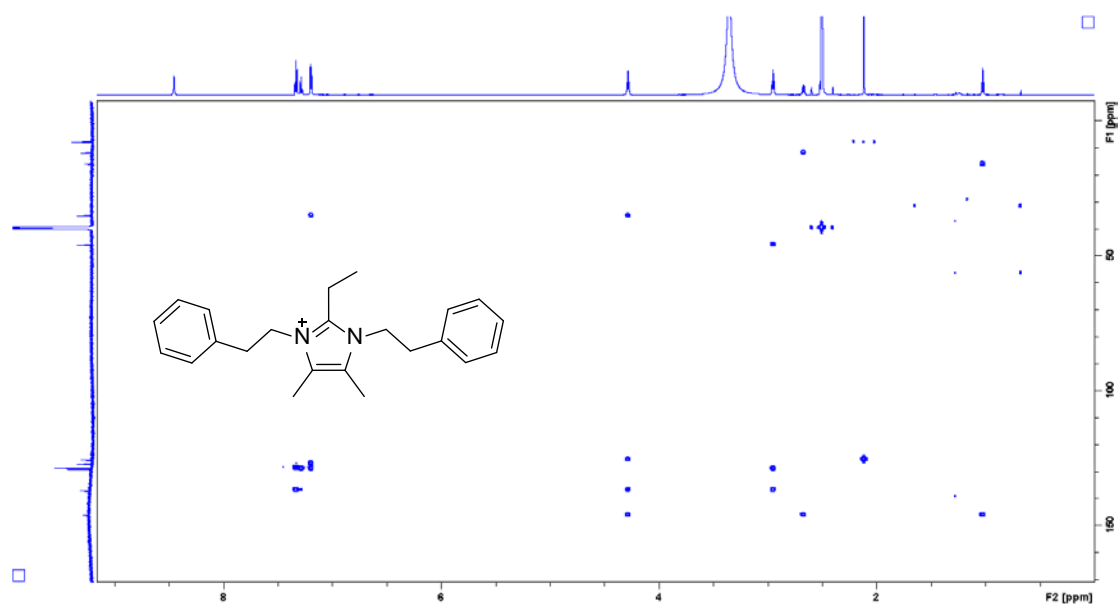

**Figure S42.** The  $^1\text{H}$ - $^{13}\text{C}$  HMBC (700 MHz,  $\text{DMSO-}d_6$ ) spectrum of compound 6.

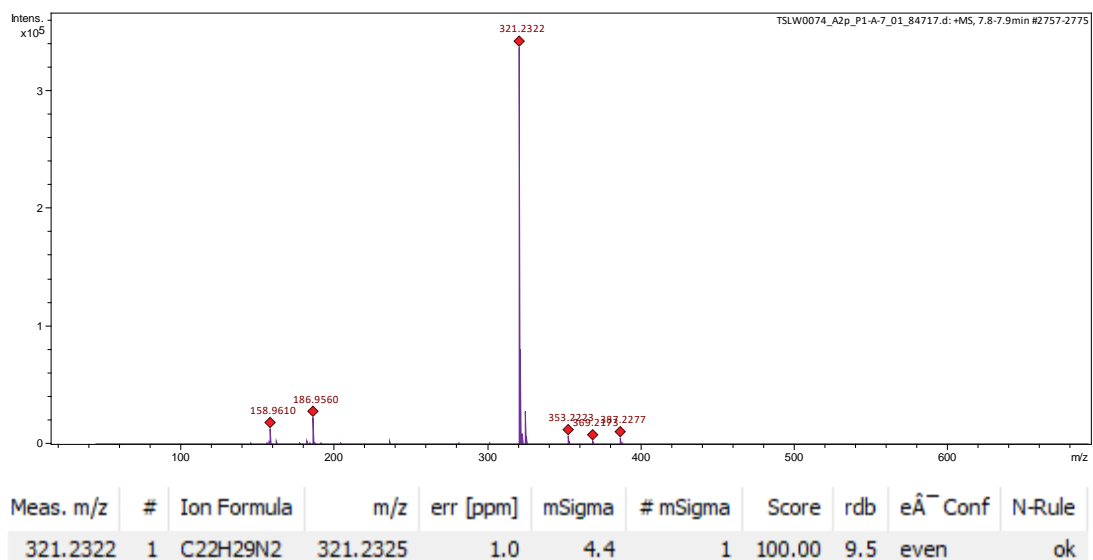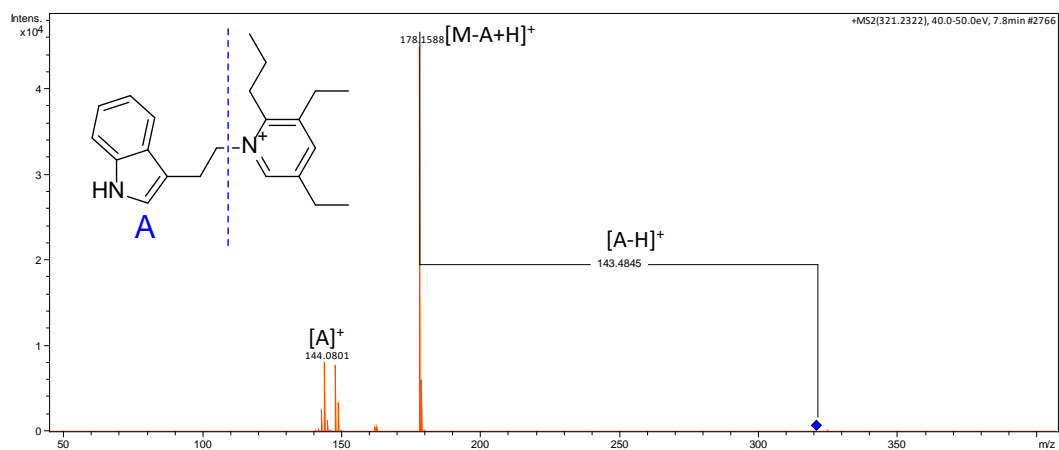

**Figure S43. The HR-ESI-MS and HR-ESI-MS/MS of compound 7.**

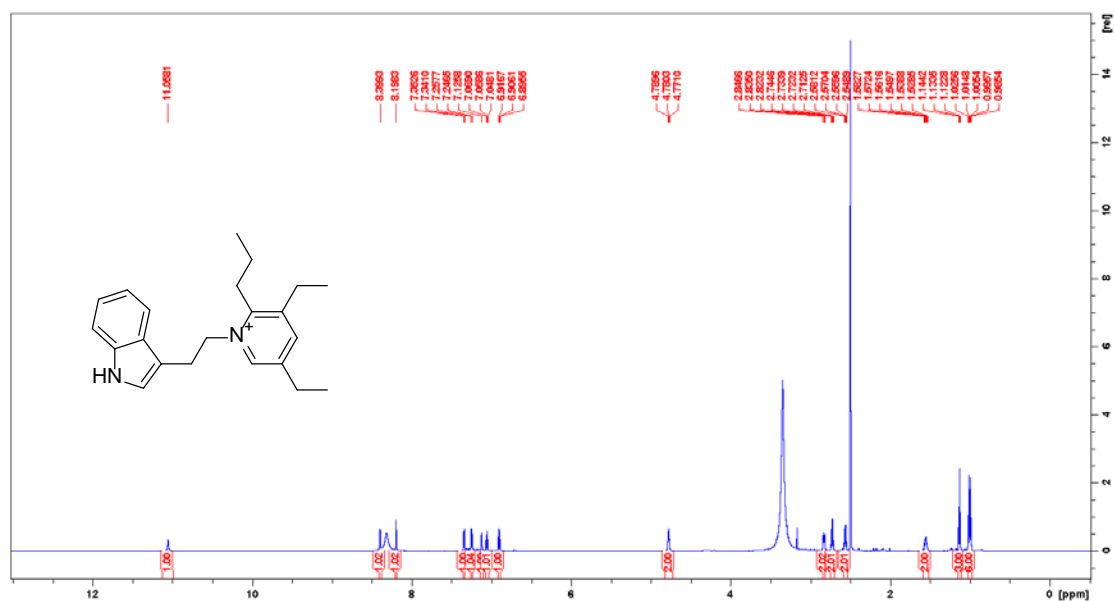

Figure S44. The <sup>1</sup>H-NMR (700 MHz, DMSO-*d*<sub>6</sub>) spectrum of compound 7

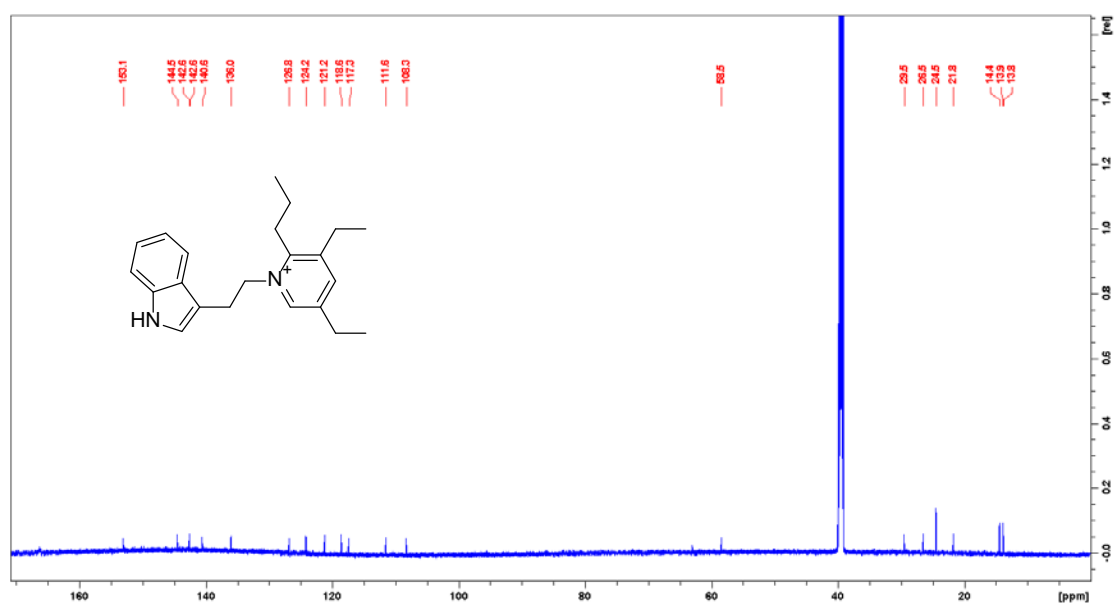

Figure S45. The <sup>13</sup>C-NMR (175 MHz, DMSO-*d*<sub>6</sub>) spectrum of compound 7

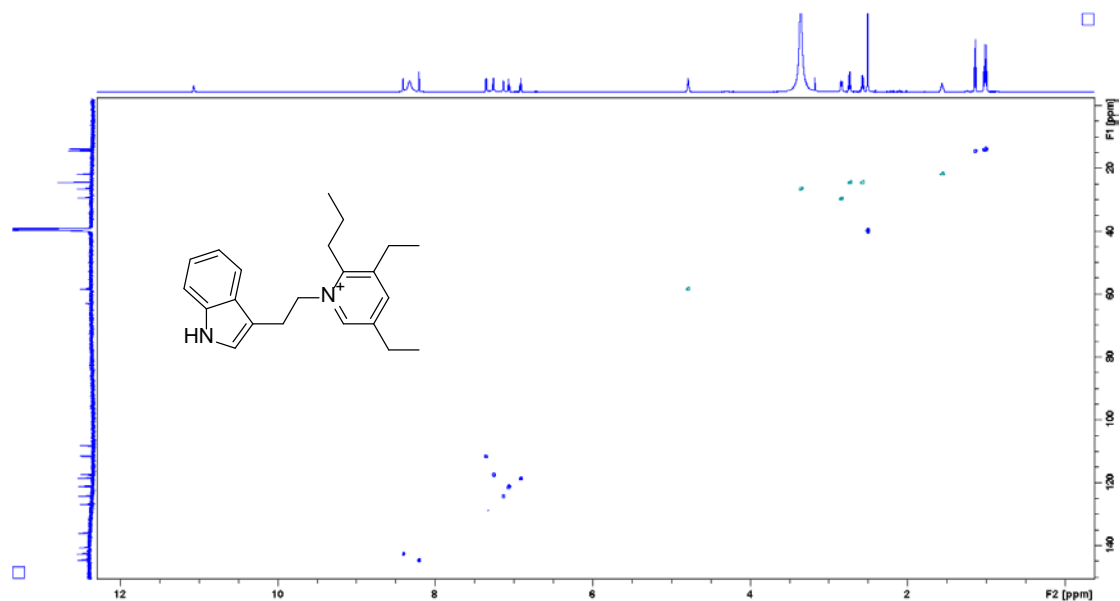

Figure S46. The HSQC (700 MHz, DMSO- $d_6$ ) spectrum of compound 7.

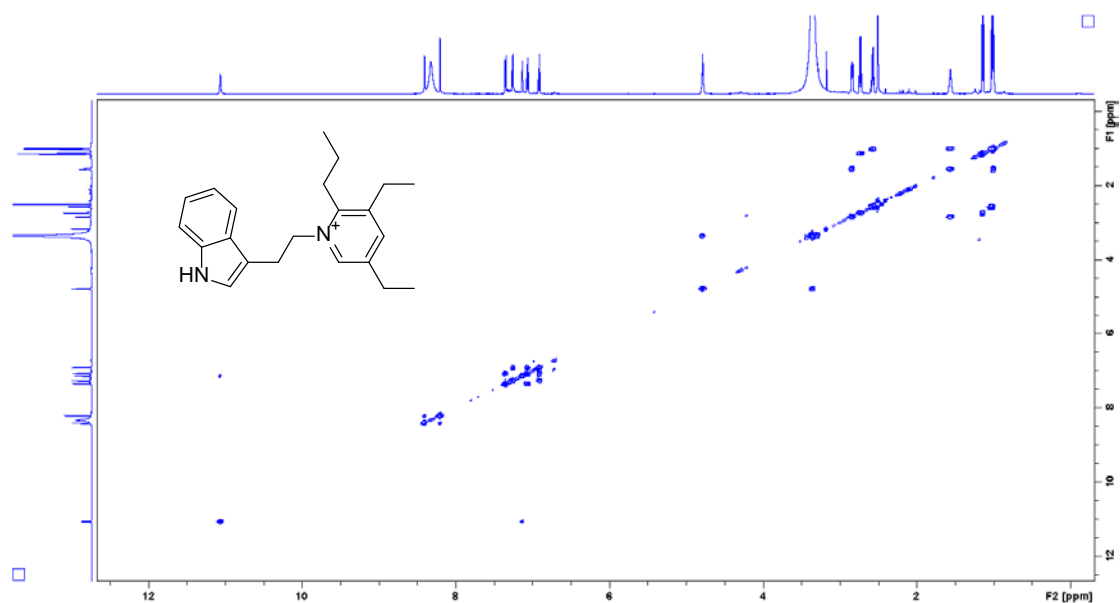

Figure S47. The  $^1\text{H}$ - $^1\text{H}$  COSY (700 MHz, DMSO- $d_6$ ) spectrum of compound 7.



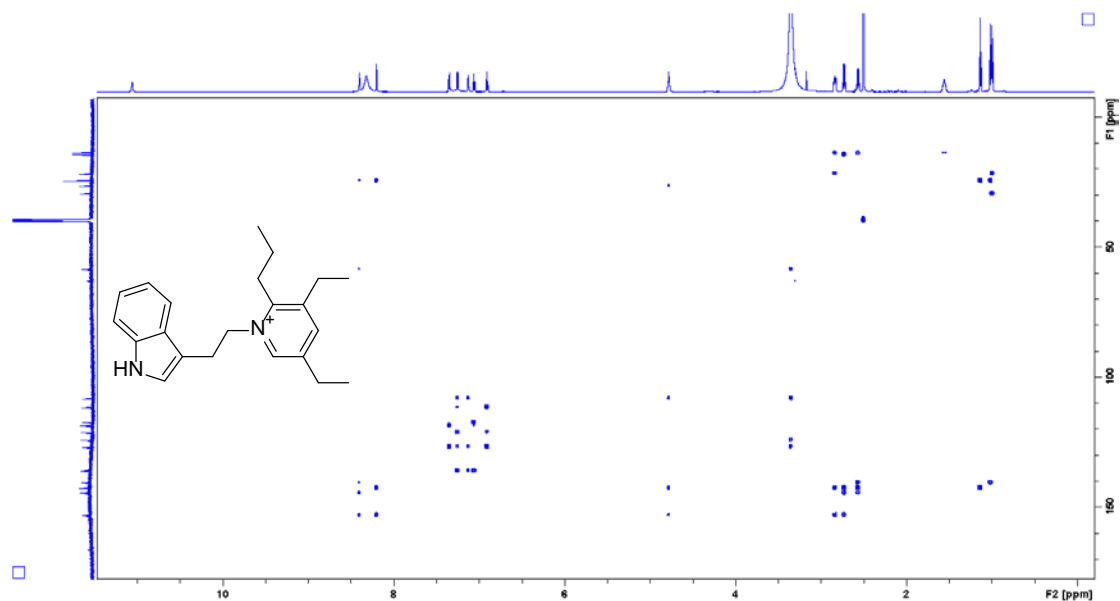

Figure S48. The  $^1\text{H}$ - $^{13}\text{C}$  HMBC (700 MHz,  $\text{DMSO}-d_6$ ) spectrum of compound 7.

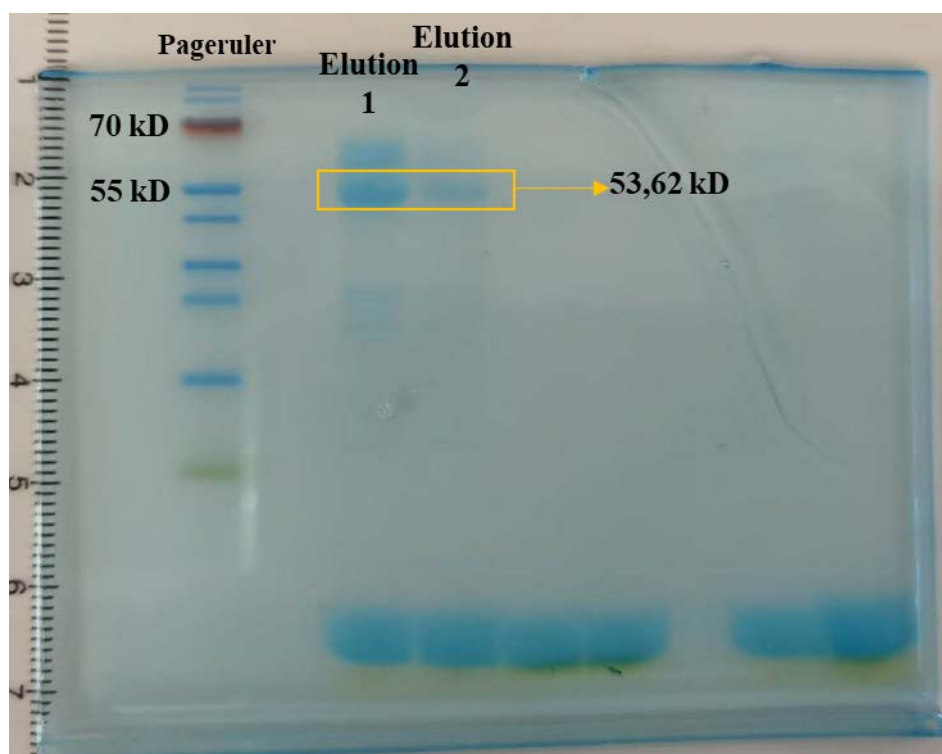

Figure S49. SDS-PAGE gel showing the purification of His-tagged DisA.
